1           Reward motivation increases univariate activity but has limited effect on  
2           coding of task-relevant information across the frontoparietal cortex

3

4

5   \*Sneha Shashidhara<sup>a</sup>, Yaara Erez<sup>a</sup>

6

7   <sup>a</sup>MRC Cognition and Brain Sciences Unit, University of Cambridge, 15 Chaucer Road,  
8   Cambridge CB2 7EF, UK

9

10   Email addresses:

11   Sneha Shashidhara, [sneha.shashidhara@mrc-cbu.cam.ac.uk](mailto:sneha.shashidhara@mrc-cbu.cam.ac.uk)

12   Yaara Erez, [yaara.erez@mrc-cbu.cam.ac.uk](mailto:yaara.erez@mrc-cbu.cam.ac.uk)

13

14   \*Corresponding author: Sneha Shashidhara, [sneha.shashidhara@mrc-cbu.cam.ac.uk](mailto:sneha.shashidhara@mrc-cbu.cam.ac.uk)

15   Present address for Sneha Shashidhara: Psychology Department, Ashoka University, Rajiv  
16   Gandhi Education City, Sonipat, Haryana 131029, India.

17

18

19

## 1 **Abstract**

2  
3 Selection and integration of information based on current goals is fundamental for goal-  
4 directed behavior. Reward motivation has been shown to improve behavioral performance, yet  
5 the neural mechanisms that link motivation and control processes, and in particular its effect  
6 on context-dependent information processing, remain unclear. We used functional magnetic  
7 resonance imaging (fMRI) in 24 human volunteers (13 females) to test whether reward  
8 motivation enhances the coding of task-relevant information across the frontoparietal cortex,  
9 as would be predicted based on previous experimental evidence and theoretical accounts. In a  
10 cued target detection task, participants detected whether an object from a cued visual category  
11 was present in a subsequent display. The combination of the cue and the object visual category  
12 determined the behavioral status of the objects. To manipulate reward motivation, half of all  
13 trials offered the possibility of a monetary reward. We observed an increase with reward in  
14 overall univariate activity across the frontoparietal control network when the cue and  
15 subsequent object were presented. Multivariate pattern analysis (MVPA) showed that  
16 behavioral status information for the objects was conveyed across the network. However, in  
17 contrast to our prediction, reward did not increase the discrimination between behavioral status  
18 conditions in the stimulus epoch of a trial when object information was processed depending  
19 on a current context. In the high-level general-object visual region, the lateral occipital  
20 complex, the representation of behavioral status was driven by visual differences and was not  
21 modulated by reward. Our study provides useful evidence for the limited effects of reward  
22 motivation on task-related neural representations and highlights the necessity to unravel the  
23 diverse forms and extent of these effects.

24

- 1 **Keywords:** frontoparietal cortex, functional magnetic resonance imaging, reward, task
- 2 representation, multivoxel pattern analysis

## 1 Abbreviations

2 MD: multiple-demand

3 LOC: lateral occipital complex

4 LDC: linear discriminant contrast

5

### 6 **Additional neuroanatomical abbreviations:**

7 pdLFC: posterior/dorsal lateral prefrontal cortex

8 aMFG: anterior part middle frontal gyrus

9 mMFG: middle part of the middle frontal gyrus

10 pMFG: posterior part of the middle frontal gyrus

11 IPS: intraparietal sulcus

12 preSMA: pre-supplementary motor area

13 ACC: anterior cingulate cortex

14 AI: anterior insula

15 FO: frontal operculum

16 pFs: posterior fusiform region

17 LO: lateral occipital region

18

19

20

## 1 **1. Introduction**

2  
3 A fundamental aspect of flexible goal-directed behavior is the selection and integration of  
4 information depending on a current goal to determine its relevance to behavior and lead to a  
5 decision. With growing interest in recent years in the link between cognitive control and reward  
6 motivation, it has been proposed that reward enhances control processes by sharpening  
7 representation of task goals and prioritizing task-relevant information across the frontoparietal  
8 control network and other regions associated with cognitive control (Botvinick and Braver,  
9 2015; Etzel et al., 2016; Kruglanski et al., 2002; Simon, 1967). In line with this idea, it has  
10 been shown that motivation, usually manipulated as monetary reward, increases task  
11 performance (Padmala and Pessoa, 2011, 2010). Neuroimaging studies linked increased  
12 activity with reward in frontoparietal regions across a range of tasks, including working  
13 memory (Pochon et al., 2002; Taylor et al., 2004), selective attention (Krebs et al., 2012;  
14 Mohanty et al., 2008), response inhibition (Padmala and Pessoa, 2011), and problem solving  
15 (Shashidhara et al., 2019).

16 Although the accumulating evidence at the behavioral and neural level in humans are consistent  
17 with this sharpening and prioritization account (Braver, 2012; Chiew and Braver, 2014;  
18 Kruglanski et al., 2002; Miller et al., 1960; Pessoa, 2009; Simon, 1967), they do not directly  
19 address the effect of reward motivation on the coding of task-related information and selection  
20 and integration processes. Some support for this idea comes from single-neuron data recorded  
21 from the prefrontal cortex of non-human primates: reward was associated with greater spatial  
22 selectivity, enhanced activity related to working memory and modulated task-related activity  
23 based on the type of reward (Kennerley and Wallis, 2009; Leon and Shadlen, 1999; Watanabe,  
24 1996). A more direct evidence in humans was recently demonstrated by Etzel et al. (2016).  
25 They showed that reward enhances coding of task cues across the frontoparietal cortex and  
26 suggested that task-set efficacy increases with reward. It remained an open question whether

1 this facilitative effect of reward is limited to preparatory cues, or if reward also enhances the  
2 coding of behaviorally relevant information when the cue and a subsequent stimulus are  
3 integrated, leading to the behavioral decision. Effects of reward during both cue and stimulus  
4 epochs of a trial are complementary to one another, and processing during both epochs is vital  
5 when reaching a decision. In a recent electroencephalogram (EEG) study, Hall-McMaster et  
6 al. (Hall-McMaster et al., 2019) showed that reward increases coding of task cues. However,  
7 these increases were observed only for ‘switch’ trials where task rules had to be updated. In  
8 addition, they also provided some evidence that the representation of task-relevant features is  
9 enhanced when reward level is high. Given the limited spatial resolution of EEG, it is unclear  
10 whether these effects of reward are specific to the frontoparietal control network. Taken  
11 together, these previous findings demonstrate that the effects of reward on representation of  
12 task-related information may not be generalized and robust but rather specific to certain  
13 cognitive demands and trial epochs.

14 To further shed light on the extent of the effects of reward on neural representations, here we  
15 focus on the attentional saliency of task-relevant information as determined by the nature of  
16 the task. Consistent with the idea that the frontoparietal network is involved in selection and  
17 integration of task-relevant information, in previous work we showed that top-down attentional  
18 saliency of items from different visual categories, as determined by their likelihood of being  
19 targets, drives representation across this network (Erez and Duncan, 2015). Thus, rather than  
20 representation of the visual categories themselves, it was the attentional saliency, or behavioral  
21 status of the items, as determined by the integration of cue and stimulus input, that was the  
22 task-relevant aspect represented across the network. In the current study, we ask whether  
23 reward motivation enhances the representation of task-related behavioral status across the  
24 frontoparietal network. Furthermore, previous studies have associated reward with decreased  
25 conflict in interference tasks (Krebs et al., 2013; Padmala and Pessoa, 2011; Stürmer et al.,

1 2011), suggesting that any effect of reward may be particularly important for high-conflict  
2 items, in other words, a conflict-contingent effect. We therefore also asked whether such  
3 facilitative effect of reward is selective for highly conflicting items. We used fMRI and  
4 multivariate pattern analysis (MVPA) to measure representation of the task-related behavioral  
5 status as well as visual categories in distributed patterns of response in the human brain.  
6 Specifically, we tested whether pattern discriminability increased with reward in the *a priori*  
7 chosen frontoparietal ‘multiple-demand’ (MD) network (Duncan, 2010; Fedorenko et al.,  
8 2013), which has been associated with multiple aspects of cognitive control, such as working  
9 memory, task sets, conflict monitoring, task switching, and task-dependent categorical  
10 decisions (Cole et al., 2016; Erez and Duncan, 2015; Fedorenko et al., 2013; Li et al., 2007;  
11 Muhle-Karbe et al., 2017; Nastase et al., 2017; Vergauwe et al., 2015; Wisniewski et al., 2016).  
12 Lastly, it is commonly accepted that top-down signals from the frontoparietal MD network to  
13 the visual cortex play an important role in the processing of task-related information. Therefore,  
14 we tested whether similar effects of reward would be observed in the high-level general-object  
15 visual region, the lateral occipital complex (LOC).

16

## 17 **2. Materials and Methods**

18

### 19 **2.1 Participants**

20

21 24 participants (13 females), between the ages of 18-40 years (mean age: 25) took part in the  
22 study. Four additional participants were excluded due to large head movements during the scan  
23 (greater than 5 mm). The sample size was determined prior to data collection as typical for  
24 neuroimaging studies, in accordance with sample sizes in previous fMRI studies that showed  
25 sufficient power to detect representation of behavioral status and effects of reward on coding  
26 of task information (Erez and Duncan, 2015; Etzel et al., 2016), and to comply with counter-

1 balancing requirements of the experimental design across participants. All participants were  
2 right-handed with normal or corrected-to-normal vision and had no history of neurological or  
3 psychiatric illness. The study was conducted with approval by the Cambridge Psychology  
4 Research Ethics Committee. All participants gave written informed consent and were  
5 monetarily reimbursed for their time.

## 6 2.2 Task design

7  
8 Participants performed a cued target detection categorization task in the MRI scanner (Figure  
9 1A). On each trial, integration of a preceding cue and the presented object determined the  
10 behavioral status of the object. Our primary question concerned the representation during the  
11 stimulus epoch of a trial where cue and stimulus are integrated, and we therefore designed the  
12 task accordingly. At the beginning of each trial, one of three visual categories (sofas, shoes,  
13 cars) was cued, determining the target category for that trial. Participants had to indicate  
14 whether the subsequent object matched this category or not by pressing a button. For each  
15 participant, only two of the categories were cued as targets throughout the experiment.  
16 Depending on the cue on a given trial, objects from these categories could be either Targets, or  
17 nontargets with high conflict as they could serve as targets on other trials (High-conflict  
18 nontarget). The third category was never cued, therefore objects from this category served as  
19 Low-conflict nontargets. This design yielded three behavioral status conditions: Targets, High-  
20 conflict nontargets and Low-conflict nontargets (Figure 1B). Critically, following the  
21 integration of the cue and presented object, the relevant information that is expected to be  
22 represented across the MD network is the behavioral status of a given category, rather than the  
23 visual category itself (Erez and Duncan, 2015). Therefore, the task-relevant distinctions that  
24 were tested using MVPA were pairs of categories with different behavioral status. The  
25 assignment of the categories to be cued (and therefore serve as either Targets or High-conflict



1 nontargets) or not (and serve as Low-conflict nontargets) was counter-balanced across  
2 participants.

3 To manipulate motivation, half of the trials were cued as reward trials in which a monetary  
4 reward was offered. On these reward trials, participants had the chance of earning £1 if they  
5 completed the trial correctly and within a time limit. Four random reward trials out of 32 in  
6 each run were assigned the £1 reward, thus ensuring an incentive on all reward trials. To avoid  
7 longer reaction times when participants try to maximize their reward, a response time threshold  
8 was used for reward trials, set separately for each participant as the average of 32 trials in a  
9 pre-scan session. The participants were told that the maximum reward they could earn is £24  
10 in the entire session (£4 per run) and were not told what the time threshold was. Therefore, to  
11 maximize their gain, participants had to treat every reward trial as a £1 trial and respond as  
12 quickly and as accurately as possible, just as in no-reward trials.

13 Each trial started with a 1 s cue, which was the name of a visual category that served as the  
14 target category for this trial. On reward trials, the cue included three red pound signs presented  
15 next to the category name. The cue was followed by a fixation dot in the center of the screen  
16 presented for 0.5 s and an additional variable time of either 0.1, 0.4, 0.7 or 1 s, selected  
17 randomly, in order to make the stimulus onset time less predictable. The stimulus was then  
18 presented for 120 ms and was followed by a mask. The stimulus duration was fixed and  
19 identical for all trials. Participants indicated by a button press whether this object belonged to  
20 the cued target category (present) or not (absent). Following response, a 1 s blank inter-trial  
21 interval separated two trials. For both reward and no-reward trials, response time was limited  
22 to a maximum of 3 s, after which the 1 s blank inter-trial interval started even when no response  
23 was made. For reward trials, an additional subject-specific response time threshold was used  
24 as mentioned above to determine whether the participants earned the reward or not, but this  
25 time threshold did not affect the task structure and was invisible to the participants.

1 We used catch trials to decorrelate the BOLD signals of the cue and stimulus phases. 33% of  
2 all trials included cue followed by fixation dot for 500 ms, which then turned red for another  
3 500 ms indicating the absence of the stimulus, followed by the inter-trial interval.

4 The combination of multiple factors in the task design resulted in a cognitively demanding task  
5 that was expected to recruit MD regions. These factors include frequent cue changes, short  
6 stimulus presentation duration, short inter-trial interval and change of response mapping. We  
7 also note that there are multiple aspects of information selection that are of interest when  
8 considering the effect of reward motivation on neural representation, one of which is how it  
9 may bias attention to reward-associated stimuli when two or more stimuli are presented  
10 simultaneously and compete for attention. Here we focus on single stimulus displays and the  
11 integration of cue and stimulus that generates the behavioral status of the stimuli as a starting  
12 point, while attentional competition may be address in future studies.

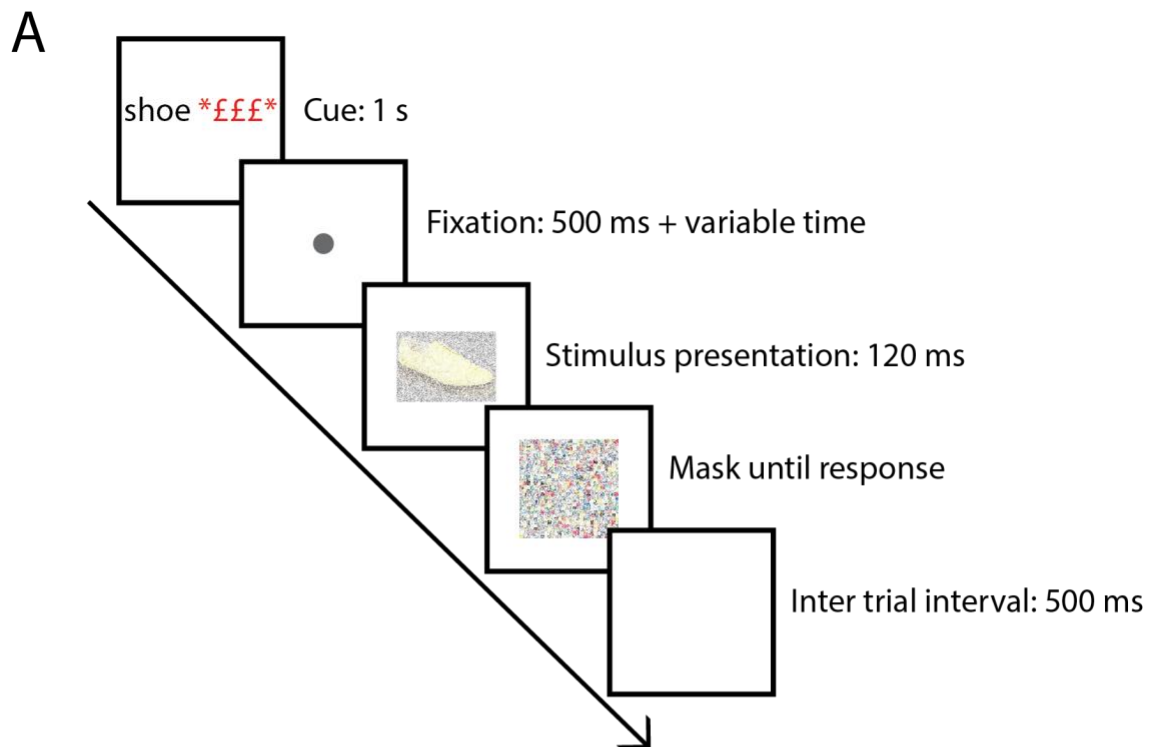

**B**

|           | Target                                                                                      | High-conflict nontarget                                                                      | Low-conflict nontarget                                                                       |
|-----------|---------------------------------------------------------------------------------------------|----------------------------------------------------------------------------------------------|----------------------------------------------------------------------------------------------|
| Cue: shoe | shoe<br> | sofa<br> | car<br> |
| Cue: sofa | sofa<br> | shoe<br> | car<br> |

1

2 **Figure 1: Experimental paradigm. A.** An example trial. A trial began with a cue (1 s)  
 3 indicating the target category, followed by 500 ms fixation period. Reward trials were cued  
 4 with three red £ symbols next to the target category. After an additional variable time (0.4, 0.7,  
 5 1.0 or 1.3 s), an object was presented for 120 ms. The object was then masked (a scramble of  
 6 the all the stimuli used), until response or for a maximum of 3 s. The participants pressed a  
 7 button to indicate whether the object was from the cued category (Target trials) or not

1 (Nontarget trials). 33% of all trials were catch trials. These included cue followed by fixation  
2 dot for 500 ms, which then turned red for another 500 ms indicating the absence of the stimulus,  
3 followed by the inter-trial interval. **B. Experimental conditions.** For each participant, two  
4 categories served as potential targets depending on the cue, and a third category never served  
5 as target. Here as an example, shoes and sofas are the cued categories and cars as the uncued  
6 category. In the Target trials, the presented object matched the cued category. In the High-  
7 conflict nontarget trials, the object did not match the cued category, but was from the other  
8 cued category, therefore could serve as a target on other trials. In the Low-conflict nontarget  
9 trials, the presented object was from the category that was never cued. Overall, this design  
10 yielded three levels of behavioral status: Targets, High-conflict nontargets, and Low-conflict  
11 nontargets. The design was used for both no-reward and reward conditions.

12

### 13 2.3 Stimuli

14

15 Objects were presented at the center of the screen on a grey background. The objects were  
16 2.95° visual angle along the width and 2.98° visual angle along the height. Four exemplars  
17 from each visual category were used. Exemplars were chosen with similar colors, dimensions,  
18 and orientation across the categories. All exemplars were used an equal number of times in  
19 each condition and in each run to ensure that any differences between the experimental  
20 conditions will not be driven by the variability of exemplars. To increase the task demand,  
21 based on pilot data, we added Gaussian white noise to the stimuli. The post-stimulus mask was  
22 generated by randomly combining pieces of the stimuli that were used in the experiment. The  
23 mask was the same size as the stimuli and was presented until a response was made or the  
24 response time expired.

### 25 2.4 Structure and design

26

1 Each participant completed 6 functional runs of the task in the scanner (mean duration  $\pm$  SD:  
2  $6.2 \pm 0.13$  min). Each run started with a response-mapping instructions screen (e.g., left = target  
3 present, right = target absent), displayed until the participants pressed a button to continue.  
4 Halfway through the run, the instructions screen was presented again with the reversed  
5 response mapping. All trials required a button response to indicate whether the target was  
6 present or absent, and the change of response mapping ensured that conditions were not  
7 confounded by the side of the button press. Each run included 104 trials. Out of these, 8 were  
8 dummy trials following the response mapping instructions (4 after each instructions screen)  
9 and were excluded from the analysis. Of the remaining 96 trials, one-third (32 trials) were cue-  
10 only trials (catch trials). Of the remaining 64 trials, 32 were no-reward trials and 32 were reward  
11 trials. Of the 32 no-reward trials, half (16) were cued with one visual category, and half (16)  
12 with the other. For each cued category, half of the trials (8) were Target trials, and half of the  
13 trials (8) were nontarget trials, to ensure an equal number of target (present) and nontarget  
14 (absent) trials. Of the nontarget trials, half (4) were High-conflict nontargets, and half (4) were  
15 Low-conflict nontargets. There were 4 trials per cue and reward level for the High- and Low-  
16 conflict nontarget conditions, and 8 for the Target condition, with the latter split into two  
17 regressors (see 2.7.2 General Linear Model (GLM) for the Main Task section below). A similar  
18 split was used for reward trials. The task included an overall of 96 Target trials, 48 High-  
19 conflict nontarget trials, and 48 Low-conflict nontarget trials for each reward level (no-reward  
20 and reward) across runs and cued categories. An event-related design was used, and the order  
21 of the trials was randomized in each run. At the end of each run, the money earned in the reward  
22 trials and the number of correct trials (across both reward and no-reward trials) were presented  
23 on the screen.

## 24 2.5 Functional localizers

25

1 In addition to the main task, we used two other tasks in order to functionally localize MD  
2 regions and LOC in individual participants using independent data. These functional localizer  
3 data were used for subject-specific ROI definitions within anatomical constraints of ROI  
4 templates for MD regions and LOC (Fedorenko et al., 2010; Shashidhara et al., 2020). See  
5 2.7.5 ROI definition and 2.7.6 Subject-specific ROIs for more details. For consistency, this  
6 approach was used for all the univariate and multivariate pattern analyses.

7 To localize MD regions, we used a spatial working memory task (Fedorenko et al., 2013). This  
8 task has been previously shown to robustly recruit the MD network similarly to other tasks  
9 across multiple cognitive domains (Fedorenko et al., 2013). Furthermore, when used as a  
10 localizer task in conjunction with anatomical constraints (i.e., the same approach as we use in  
11 the current study), decoding levels in an independent task across the MD network were similar  
12 to other MD localizer tasks (Shashidhara et al., 2020), thus supporting its suitability for subject-  
13 specific localization of the MD network, in particular when addressing pattern discriminability.  
14 On each trial, participants remembered 4 locations (Easy condition) or 8 locations (Hard  
15 condition) in a 3X4 grid. Each trial started with fixation for 500 ms. Locations on the grid were  
16 then highlighted consecutively for 1 s (1 or 2 locations at a time, for the Easy and Hard  
17 conditions, respectively). In a subsequent two-alternative forced-choice display (3 s),  
18 participants had to choose the grid with the correct highlighted locations by pressing the left or  
19 the right button. Feedback was given after every trial for 250 ms. Each trial was 8 s long, and  
20 each block included 4 trials (32 s). There was an equal number of correct grids on the right and  
21 left in the choice display. Participants completed 2 functional runs of 5 min 20 sec each, with  
22 5 Easy blocks alternated with 5 Hard blocks in each run. We used the contrast of Hard vs. Easy  
23 blocks to localize MD regions.

24 As a localizer for LOC, we used a one-back task with blocks of objects interleaved with blocks  
25 of scrambled objects. The objects were in grey scale and taken from a set of 61 everyday objects

1 (e.g., camera, coffee cup, etc.). Participants had to press a button when the same image was  
2 presented twice in a row. Images were presented for 300 ms followed by a 500 ms fixation.  
3 Each block included 15 images with two image repetitions and was 12 s long. Participants  
4 completed two runs of this task, with 8 object blocks, 8 scrambled object blocks, and 5 fixation  
5 blocks. The objects vs. scrambled objects contrast was used to localize LOC.

## 6 2.6 Scanning session

7  
8 The scanning session included a structural scan, 6 functional runs of the main task, and 4  
9 functional localizer runs – 2 for MD regions and 2 for LOC. The scanning session lasted up to  
10 100 minutes, with an average 65 minutes of EPI time. The tasks were introduced to the  
11 participants in a pre-scan training session. The average reaction time of 32 no-reward trials of  
12 the main task completed in this practice session was set as the time threshold for the reward  
13 trials to be used in the scanner session. All tasks were written and presented using  
14 Psychtoolbox3 (Brainard, 1997) and MatLab (The MathWorks, Inc).

### 15 2.6.1 Data acquisition

16  
17 fMRI data were acquired using a Siemens 3T Prisma scanner with a 32-channel head coil. We  
18 used a multi-band imaging sequence (CMRR, release 016a) with a multi-band factor of 3,  
19 acquiring 2 mm isotropic voxels (Feinberg et al., 2010). Whole-brain scans were acquired.  
20 Other acquisition parameters were: TR = 1.1 s, TE = 30 ms, 48 slices per volume with a slice  
21 thickness of 2 mm and no gap between slices, in plane resolution  $2 \times 2$  mm, field of view 205  
22 mm, flip angle  $62^\circ$ , and interleaved slice acquisition order. No iPAT or in-plane acceleration  
23 were used. T1-weighted multiecho MPRAGE (van der Kouwe et al., 2008) high-resolution  
24 images were also acquired for all participants, in which four different TEs were used to generate  
25 four images (voxel size 1 mm isotropic, field of view of  $256 \times 256 \times 192$  mm, TR = 2530 ms,  
26 TE = 1.64, 3.5, 5.36, and 7.22 ms). The voxelwise root mean square across the four MPRAGE  
27 images was computed to obtain a single structural image.

## 1 2.7 Data and statistical analysis

2  
3 The primary analysis approach was multi-voxel pattern analysis (MVPA), to assess  
4 representation of behavioral status distinctions with and without reward. An additional ROI-  
5 based univariate analysis was conducted to confirm the recruitment of the MD network.  
6 Preprocessing, GLM and univariate analysis of the fMRI data were performed using SPM12  
7 (Wellcome Department of Imaging Neuroscience, London, England; [www.fil.ion.ucl.ac.uk](http://www.fil.ion.ucl.ac.uk)),  
8 and the Automatic Analysis (aa) toolbox (Cusack et al., 2014). The analysis choices described  
9 below were determined *a priori* to conducting the analyses.

10 We used an alpha level of .05 for all statistical tests. Bonferroni correction for multiple  
11 comparisons was used when required, and the corrected p-values and uncorrected t-values are  
12 reported. All t tests that were used to compare two conditions were paired due to the within-  
13 subject design. A one-tailed t test was used when the prediction was directional, including  
14 testing for classification accuracy above chance level. All other t tests in which the *a priori*  
15 hypothesis was not directional were two-tailed. Additionally, effect size (Cohen's  $d_z$ ) was  
16 computed. We note that using a t test for group level inference of classification accuracy above  
17 chance may be limited in its interpretation as true accuracies cannot be below chance level  
18 (Allefeld et al., 2016). We emphasize that tests for classification accuracies above chance are  
19 reported in the Results as a complementary measure while the main research question concerns  
20 the *change* in decoding level with reward. A post-hoc sensitivity power analysis was conducted  
21 for the effect of reward modulation of decoding in MD regions, with alpha level of 0.05, power  
22 of 0.8 and one tail (Faul et al., 2007). All analyses were conducted using custom-made  
23 MATLAB (The Mathworks, Inc) scripts, unless otherwise stated.

### 24 2.7.1 Pre-processing

25  
26 Initial processing included motion correction and slice time correction. The structural image  
27 was coregistered to the Montreal Neurological Institute (MNI) template, and then the mean EPI



1 was coregistered to the structural. The structural image was then normalized to the MNI  
2 template via a nonlinear deformation, and the resulting transformation was applied on the EPI  
3 volumes. Spatial smoothing of FWHM = 5 mm was performed for the functional localizers  
4 data only.

### 5 2.7.2 General Linear Model (GLM) for the main task

6  
7 We used GLM to model the main task and localizers' data. Regressors for the main task  
8 included 12 conditions during the stimulus epoch and 4 conditions during the cue epoch.  
9 Regressors during the stimulus epoch were split according to reward level (no-reward, reward),  
10 cued visual category (cue 1, cue 2), and behavioral status (Target, High-conflict nontarget,  
11 Low-conflict nontarget). Since the combination of cued category and the stimulus category on  
12 each trial determined the behavioral status, the regressors for each reward level included all  
13 possible combinations of cued and stimulus category: cue1-stimulus1 (Target), cue1-stimulus2  
14 (High-conflict nontarget), cue1-stimulus3 (Low-conflict nontarget), cue2-stimulus 2 (Target),  
15 cue2-stimulus1 (High-conflict nontarget), cue2-stimulus2 (Low-conflict nontarget). To ensure  
16 an equal number of target present and target absent trials, the number of Target trials in our  
17 design was twice the number of High-conflict and Low-conflict nontarget trials. The Target  
18 trials included two repetitions of each combination of cue, visual category and exemplar, with  
19 a similar split for reward trials. These two Target repetitions were modelled as separate Target1  
20 and Target2 regressors in the GLM to make sure that all the regressors were based on an equal  
21 number of trials but were invisible to the participants. All the univariate and multivariate  
22 analyses were carried out while keeping the two Target regressors separate to avoid any bias  
23 of the results, and they were averaged at the final stage of the results. Overall, the GLM  
24 included 16 regressors of interest for the 12 stimulus conditions. Each regressor was based on  
25 data from all correct trials in the respective condition in each run (up to 4 trials), i.e., the  
26 regressors were computed separately for each run. To account for possible effects of reaction

1 time (RT) on the beta estimates because of the varying duration of the stimulus epoch, and as  
2 a consequence their potential effect on decoding results, these regressors were modelled with  
3 durations from stimulus onset to response (Woolgar et al., 2014). This model assumes that  
4 activity in each voxel continues throughout the phase, and as long as the participant is  
5 performing the trial. This ensured that we capture the entire cognitive processing of integration  
6 of stimulus and cue until a decision is reached in all trials, but we emphasize that the actual  
7 stimulus duration was fixed for all trials. Since this model scales the regressors based on the  
8 reaction time, the beta estimates reflect activation per unit time and are comparable across  
9 conditions with different durations. In addition to regressors during the stimulus epoch, we also  
10 modelled the cue epoch. Cue regressors included both task and cue-only (catch) trials and were  
11 split by reward level and cued category, modelled with duration of 1 s. Cue regressors were  
12 based on 16 trials per regressor per run. As one-third of all trials were catch trials, the cue and  
13 stimulus epoch regressors were decorrelated and separable in the GLM. All the regressors were  
14 convolved with the canonical hemodynamic response function (HRF). The 6 movement  
15 parameters and run means were included as covariates of no interest.

16 As one of our control analyses, we classified patterns of activity of motor response (left vs.  
17 button presses) in motor areas. For this analysis, we constructed a separate GLM. This GLM  
18 was similar to the above GLM of the main task, with the only difference being the stimulus  
19 phase regressors. For this model, we used two regressors (right press, left press) for each of the  
20 two reward levels (no-reward, reward), a total of four regressors.

### 21 2.7.3 GLM for the functional localizers

22  
23 For the MD localizer, regressors included Easy and Hard blocks. For LOC, regressors included  
24 objects and scrambled objects blocks. Each block was modelled with its duration. The  
25 regressors were convolved with the canonical hemodynamic response function (HRF). The 6  
26 movement parameters and run means were included as covariates of no interest.

#### 1 2.7.4 Univariate analysis

2  
3 We conducted an ROI analysis to test for the effect of reward on overall activity for the  
4 different behavioral status conditions and cues. We used individually defined ROIs based on  
5 subject-specific independent functional localizer data within anatomical constraints of  
6 templates for the MD network and for LOC as defined below (see 2.7.5 ROI definition 2.7.6  
7 and subject-specific ROIs). Using the MarsBaR toolbox (<http://marsbar.sourceforge.net>; Brett  
8 et al., 2002) for SPM 12, beta estimates for each regressor of interest were extracted and  
9 averaged across runs, and across voxels within each ROI, separately for each participant and  
10 condition. For the MD network, beta estimates were also averaged across hemispheres (see  
11 2.7.5 ROI definition below). Second-level analysis was done on beta estimates across  
12 participants using repeated measures ANOVA. The data for the Target condition was averaged  
13 across the two Target1 and Target2 regressors, separately for the no-reward and reward  
14 conditions.

#### 15 16 2.7.5 ROI definition

17  
18 *MD network template.* ROIs of the MD network were defined *a priori* using an independent  
19 data set (Fedorenko et al. 2013; see t-map at [http://imaging.mrc-](http://imaging.mrc-cbu.cam.ac.uk/imaging/MDsystem)  
20 [cbu.cam.ac.uk/imaging/MDsystem](http://imaging.mrc-cbu.cam.ac.uk/imaging/MDsystem)). These included the anterior, middle, and posterior parts  
21 of the middle frontal gyrus (aMFG, mMFG, and pMFG, respectively), a posterior dorsal region  
22 of the lateral frontal cortex (pdLFC), AI-FO, pre-SMA/ACC, and IPS, defined in the left and  
23 right hemispheres. The visual component in this template is widely accepted as a by-product  
24 of using largely visual tasks and is not normally considered as part of the MD network.  
25 Therefore, it was not included in the analysis. The MD network is highly bilateral, with similar  
26 responses in both hemispheres (Fedorenko et al., 2013). We therefore averaged the results  
27 across hemispheres in all the analyses.

1 *LOC template.* LOC was defined using data from a functional localizer in an independent study  
2 with 15 participants (Lorina Naci, PhD dissertation, University of Cambridge). In this localizer,  
3 forward- and backward-masked objects were presented, as well as masks alone. Masked  
4 objects were contrasted with masks alone to identify object-selective cortex (Malach et al.,  
5 1995). Division to the anterior part of LOC, the posterior fusiform region (pFs) of the inferior  
6 temporal cortex, and its posterior part, the lateral occipital region (LO) was done using a cut-  
7 off MNI coordinate of  $Y=-62$ , as previous studies have shown differences in processing for  
8 these two regions (Erez and Yovel, 2014; MacEvoy and Epstein, 2011).

9 *Motor regions template.* For one of our control analyses, we used two anatomical masks for  
10 motor regions from the FSL (FMRIB Software Library) Harvard-Oxford atlas (Desikan et al.,  
11 2006). The precentral gyrus and the supplementary motor cortex.

## 12 2.7.6 Subject-specific ROIs

13  
14 To define subject-specific ROIs, we used independent functional localizer data for each subject  
15 within the anatomical constraints of the MD network and LOC templates (Fedorenko et al.,  
16 2010; Shashidhara et al., 2020). This has allowed us to use both a template, consistent across  
17 participants, as well as subject-specific data as derived from the functional localizers. This  
18 approach was used for all the univariate and multivariate pattern analyses in the MD network  
19 and the LOC. For the multivariate analysis, using this approach also ensured controlled ROI  
20 size for comparison between regions within the MD network and between sub-regions in LOC.  
21 For each participant, beta estimates of each condition and run were extracted for each ROI  
22 based on the MD network and LOC templates. For each MD ROI, we then selected the 200  
23 voxels with the largest t-value for the Hard vs. Easy contrast as derived from the independent  
24 subject-specific functional localizer data. This number of voxels was defined prior to any data  
25 analysis (Erez and Duncan, 2015; Shashidhara et al., 2020). The 200 voxels captured 19.5% of  
26 voxels in each MD ROI on average. For each LOC sub-region, we selected 180 voxels with

1 the largest t-values of the object vs. scrambled contrast from the independent subject-specific  
2 functional localizer data. The selected voxels were used for the voxelwise patterns in the  
3 MVPA for the main task. The number of voxels that was used for LOC was smaller than for  
4 MD regions because of the size of the pFs and LO masks. For the analysis that addressed  
5 decoding of visual categories and compared MD regions with the visual regions, we used 180  
6 voxels from all regions to keep the ROI size the same. On average, the 180 voxels captured  
7 17.5% of voxels in each MD ROI and 45% of each LOC ROI. Figure S1 shows probabilities  
8 maps of the distribution of subject-specific ROIs across MD and LOC ROIs.

9 To ensure that the decoding results are robust and do not depend on the choice of the number  
10 of selected voxels in each ROI, we repeated the main decoding analysis for MD regions with a  
11 range of ROI sizes (100, 150, 250 and 300 voxels).

### 12 2.7.7 ROI-based multivoxel pattern analysis (MVPA)

13  
14 We used MVPA to test for the effect of reward motivation on pattern discriminability between  
15 the task-related behavioral status pairs. Voxelwise patterns using the selected voxels within  
16 each template were computed for all the task conditions in the main task. We applied our  
17 classification procedure on all possible pairs of conditions as defined by the GLM regressors  
18 of interest during the stimulus presentation epoch, for the no-reward and reward conditions  
19 separately (Figure 1B). The beta estimates for each condition and run were used for the MVPA  
20 and were not normalized at any point during the analysis process. For each pair of conditions,  
21 MVPA was performed using a support vector machine classifier (LIBSVM library for  
22 MATLAB,  $c=1$ ) implemented in the Decoding Toolbox (Hebart et al., 2015). We used leave-  
23 one-run-out cross-validation in which the classifier was trained on the data of five runs (training  
24 set) and tested on the sixth run (test set). This was repeated 6 times, leaving a different run to  
25 test each time, and classification accuracies were averaged across these 6 folds. Classification  
26 accuracies were then averaged across pairs of different cued categories, yielding discrimination

1 measures for three pairs of behavioral status (Targets vs. High-conflict nontargets, Targets vs.  
2 Low-conflict nontargets, and High-conflict vs. Low-conflict nontargets) within each reward  
3 level (no-reward, reward). Because the number of Target trials in our design was twice the  
4 number of High-conflict and Low-conflict nontarget trials, each discrimination that involved a  
5 Target condition was computed separately for the two Target regressors (Target1 and Target2)  
6 and classification accuracies were averaged across them. We note that for each participant,  
7 while the visual categories were balanced for Targets and High-conflict nontargets, the visual  
8 category that was assigned as Low-conflict nontarget did not serve as a Target or High-conflict  
9 nontarget. Nevertheless, based on previous work, it is expected that behavioral status will be  
10 represented across the MD network with little or no effect of the visual category itself (Erez  
11 and Duncan, 2015).

12 The Target and High-conflict nontarget pairs of conditions included cases when both  
13 conditions had an item from the same visual category as the stimulus (following different cues),  
14 as well as cases in which items from two different visual categories were displayed as stimuli  
15 (following the same cue). To test for the contribution of the visual category to the  
16 discrimination, we split the Target vs. High-conflict nontarget pairs of conditions into these  
17 two cases and the applied statistical tests accordingly.

18 Although our main hypothesis addressed the behavioral status of the presented stimuli, several  
19 studies showed that information related to stimulus features is also represented across the MD  
20 network (Jackson et al., 2017; Woolgar et al., 2015). Rather than increased representation of  
21 the behavioral status with reward as we hypothesized, information about the visual categories  
22 themselves could increase. We therefore also tested for decoding of visual categories when  
23 both stimuli are Targets or both are High-conflict nontargets, and whether this is modulated by  
24 reward.

1 To ensure that our results for the main study question are robust across different pattern analysis  
2 techniques, we tested for the modulation of the representation of behavioral status by reward  
3 using a linear discriminant contrast (LDC) (Carlin and Kriegeskorte, 2017; Nili et al., 2014),  
4 in addition to SVM. The LDC is the cross-validated Mahalanobis distance between two classes  
5 and provides unbiased distances. Larger LDC indicates greater pattern dissimilarity, i.e.,  
6 greater discriminability, and 0 reflects no discriminability. The MVPA analysis as described  
7 above was repeated with the LDC measure and using the same voxel selection procedure. For  
8 each participant, LDC was computed for all possible pairs of conditions and LDC values were  
9 then averaged as described above to address each of the questions. The LDC analysis was  
10 implemented using the Representational Similarity Analysis toolbox (Nili et al., 2014).

11 As one of our control analyses, we tested for classification of right vs. left button presses in  
12 motor regions for no-reward and reward trials. This analysis was used as a quality check for  
13 the data and the correctness of the MVPA pipeline. We used beta estimates from a separate  
14 GLM in which trials were modelled for right/left button press only for each of the two reward  
15 levels. Decoding accuracies were computed for each reward level separately and then averaged  
16 across reward levels. The analysis was performed similarly to the MVPA described above  
17 using a support vector machine classifier (LIBSVM library for MATLAB,  $c=1$ ), implemented  
18 in the Decoding Toolbox (Hebart et al., 2015), and using a leave-one-run-out cross-validation.  
19 All voxels within the motor ROIs were used.

#### 20 2.7.8 Whole-brain searchlight pattern analysis

21  
22 To test whether regions outside the MD network show change in discriminability between  
23 voxelwise patterns of activity of task-related behavioral status when reward is introduced, we  
24 conducted a whole-brain searchlight pattern analysis (Kriegeskorte et al., 2006) using the  
25 Decoding Toolbox (Hebart et al., 2015). This analysis enables the identification of focal  
26 regions that carry relevant information, unlike the ROI-based analysis, which tests for a more

1 widely distributed representation of information across larger ROIs. For each participant, data  
2 was extracted from spherical ROIs with a 5 mm radius (maximum 65 voxels), centered on each  
3 voxel in the brain. These voxels were used to perform the same MVPA analysis using SVM as  
4 described above. Thus, for each voxel, we computed the classification accuracies for the  
5 relevant behavioral status distinctions, separately for the reward and no-reward conditions.  
6 These whole-brain maps were smoothed using a 5 mm FWHM Gaussian kernel. The t-statistic  
7 from a second level random-effects analysis on the smoothed maps was thresholded at the  
8 voxel level using FDR correction ( $p < 0.05$ ).

### 9 2.7.9 Data and code accessibility

10 All raw data and code used in this study will be deposited on a departmental repository upon  
11 publication and will be available upon any request.

## 12 **3. Results**

### 13 14 3.1 Behavior

15  
16 Overall accuracy levels were high (mean  $\pm$  SD: 92.51%  $\pm$  0.08%). Mean and SD accuracy rates  
17 for the Target, High-conflict nontarget and Low-conflict nontarget conditions in the no-reward  
18 trials were 91.2%  $\pm$  5.8%, 89.1%  $\pm$  8.8%, and 96.6%  $\pm$  3.8%, respectively; and for the reward  
19 trials they were 94.2%  $\pm$  5.0%, 87.8%  $\pm$  8.7%, 96.1%  $\pm$  4.4%, respectively (Figure 2A). A two-  
20 way repeated measures ANOVA with reward level and behavioral status as within-subject  
21 factors showed no main effect of reward ( $F_{1, 23} = 0.49$ ,  $p = 0.49$ ), confirming that the added  
22 time constraint for reward trials did not lead to drop in performance. There was a main effect  
23 of behavioral status ( $F_{2, 23} = 29.64$ ,  $p < 0.001$ ) and an interaction between reward level and  
24 behavioral status ( $F_{2, 23} = 5.81$ ,  $p < 0.01$ ). Post-hoc tests with Bonferroni correction for multiple  
25 comparisons showed larger accuracies for Low-conflict nontargets compared to Targets and  
26 High-conflict nontargets in the no-reward trials (Two-tailed t-test:  $t_{23} = 5.64$ ,  $p < 0.001$ ,  $d_z =$



1 1.15;  $t_{23} = 5.50$ ,  $p < 0.001$ ,  $d_z = 1.12$  respectively), as expected given that the Low-conflict  
2 nontarget category was fixed throughout the experiment. In the reward trials, performance  
3 accuracies were larger for Targets compared to High-conflict nontargets ( $t_{23} = 4.45$ ,  $p < 0.001$ ,  
4  $d_z = 0.91$ ) and Low-conflict nontargets compared to High-conflict ones ( $t_{23} = 5.92$ ,  $p < 0.001$ ,  
5  $d_z = 1.2$ ), with only marginal difference between Targets and Low-conflict nontargets ( $t_{23} =$   
6  $2.49$ ,  $p = 0.06$ ). Accuracies for Target trials were larger for the reward trials compared to no-  
7 reward ( $t_{23} = 2.92$ ,  $p = 0.008$ ,  $d_z = 0.61$ ), indicating a possible behavioral benefit of reward.  
8 There was no difference between reward and no-reward trials for High-conflict and Low-  
9 conflict nontargets ( $t_{23} < 1.1$ ,  $p > 0.1$ , for both).

10 RT of successful trials for the three behavioral status conditions, Target, High-conflict  
11 nontarget and Low-conflict nontarget, in the no-reward trials were  $589 \pm 98$  ms,  $662 \pm 103$  ms,  
12 and  $626 \pm 107$  ms, respectively (mean  $\pm$  SD); RTs for these conditions in the reward trials were  
13  $541 \pm 99$  ms,  $614 \pm 99$  ms,  $585 \pm 97$  ms, respectively (mean  $\pm$  SD) (Figure 2B). A two-way  
14 repeated measures ANOVA with reward level (no-reward, reward) and behavioral status as  
15 within-subject factors showed a main effect of reward ( $F_{1, 23} = 40.07$ ,  $p < 0.001$ ), with reward  
16 trials being shorter than no-reward trials, as expected from the experimental design that  
17 required a response within a time limit to receive the reward. An additional main effect of  
18 behavioral status ( $F_{2, 23} = 50.97$ ,  $p < 0.001$ ) was observed, with no interaction between reward  
19 and behavioral status ( $F_{2, 23} = 0.63$ ,  $p = 0.54$ ). Subsequent post-hoc tests with Bonferroni  
20 correction for multiple comparisons showed that RTs for Target trials were faster than High-  
21 conflict and Low-conflict nontarget trials ( $t_{23} = 10.03$ ,  $p < 0.001$ ,  $d_z = 2.05$ ;  $t_{23} = 5.17$ ,  $p < 0.001$ ,  
22  $d_z = 1.06$  respectively), and Low-conflict nontarget trials were faster than the High-conflict  
23 ones ( $t_{23} = 4.96$ ,  $p < 0.001$ ,  $d_z = 1.01$ ), as expected from a cued target detection task.

24

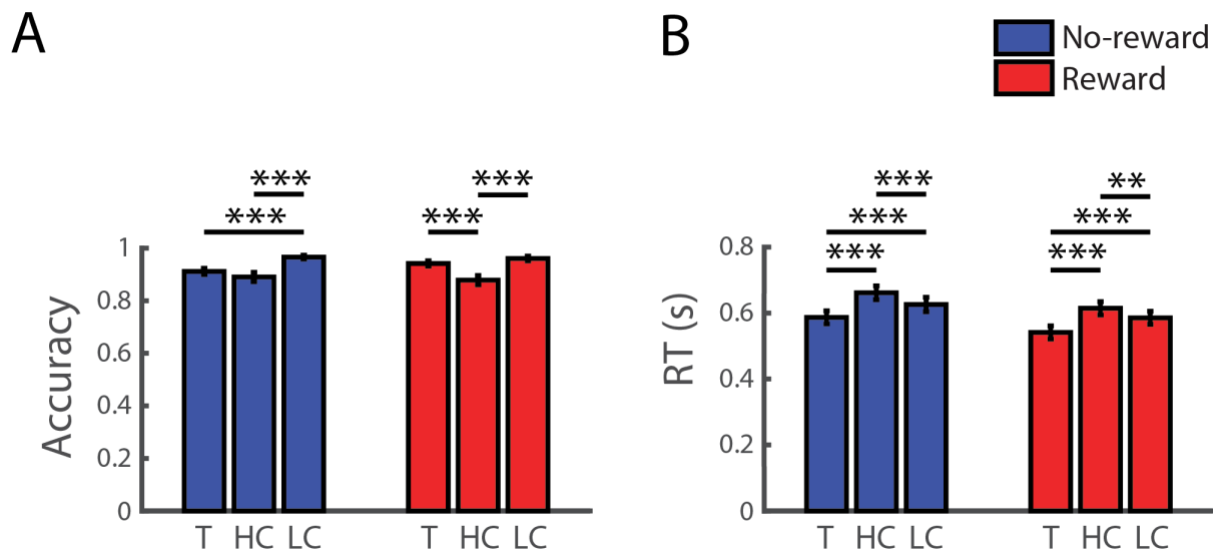

1

2 **Figure 2: Behavioral results.** **A.** Accuracy rates. Proportion of correct trials is presented for  
3 Targets (T), High-conflict nontargets (HC) and Low-conflict nontargets (LC) for no-reward  
4 and reward trials. **B.** Reaction times. Error bars indicate S.E.M. Asterisks show significance  
5 levels following a two-tailed paired t-test, corrected for 3 comparisons. \*\*  $p < 0.01$ , \*\*\*  $p <$   
6  $0.001$ .

7

### 8 3.2 Activity across the MD network during the cue epoch

9

10 To address our primary research question, the analysis focused on the stimulus epoch.  
11 However, to get a full picture of the data and for comparability with previous studies that  
12 showed increase in cue information, we also report the results for the cue epoch here. This  
13 analysis focuses only on the MD network and not the LOC, since no object stimuli were  
14 presented at this epoch of the trial.

15 We first tested for a univariate effect of reward during the cue phase (averaged across the  $\beta$   
16 estimates of the two cues) across the subject-specific ROIs for all MD regions. A two-way  
17 repeated measures ANOVA with reward (2: no-reward, reward) and ROI (7) as factors showed  
18 a main effect of reward ( $F_{1, 23} = 20.53, p < 0.001$ ) with increased activity during the reward

1 trials compared to the no-reward trials. There was also a main effect of ROI ( $F_{6, 138} = 11.63, p <$   
2  $0.001$ ) and an interaction of reward and ROI ( $F_{6, 138} = 14.74, p < 0.001$ ). Post-hoc tests showed  
3 that all regions except aMFG showed increased activation for reward trials compared to no-  
4 reward trials (Two tailed, Bonferroni corrected for 7 comparisons:  $t_{23} > 3.36, p < 0.019, d_z >$   
5  $0.69$  for all ROIs except aMFG; a trend for aMFG:  $t_{23} = 2.9, p = 0.057, d_z = 0.59$ ). Overall, the  
6 MD network showed a strong univariate reward effect during the cue epoch.

7

8 We next asked whether the cues were decodable as measured using MVPA, and whether  
9 decoding levels increased with reward as has been previously reported (Etzel et al., 2016; Hall-  
10 McMaster et al., 2019). Decoding between the two cues separately for the two reward levels  
11 were computed in each of the MD ROIs. A two-way repeated measures ANOVA with reward  
12 (2) and ROI (7) as factors showed no main effects or interactions ( $F < 1.9, p > 0.08$ ). Decoding  
13 levels averaged across all MD ROIs were (mean  $\pm$  SD)  $51.71\% \pm 4.39\%$  and  $50.55\% \pm 6.69\%$   
14 for the reward and no-reward conditions, respectively. There was a marginally significant cue  
15 decoding for reward conditions, and no significant decoding for no-reward conditions. (One-  
16 tailed t-test, reward:  $t_{23} = 1.9, p = 0.07, d_z = 0.39$ ; no-reward:  $t_{23} = 0.4, p = 0.7, d_z = 0.07$ ).  
17 Overall, our results show that despite substantial increases in overall univariate activity with  
18 reward during the cue epoch across the MD network, the cues were not decodable in both no-  
19 reward and reward conditions.

### 20 3.3 Univariate activity in the MD network during the stimulus epoch

21

22 We started our analysis for the stimulus epoch by testing for the effect of reward motivation  
23 on the overall activity in MD regions, and whether such effect is different for the three  
24 behavioral status conditions. We used averaged  $\beta$  estimates for each behavioral status (Target,  
25 High-conflict nontarget, Low-conflict nontarget) and reward level (no-reward, reward) in each  
26 of the subject-specific MD ROIs (Figure 3).

1 Average  $\beta$  estimates across MD regions for both no-reward and reward conditions across all  
2 behavioral status conditions were significantly above 0 (Figure 3A), confirming their  
3 recruitment during the task, and providing an indication that it was cognitively demanding (no-  
4 reward:  $1.06 \pm 0.58$ ,  $t_{23} = 8.85$ , corrected  $p < 0.001$ ,  $d_z = 1.81$ ; reward:  $1.71 \pm 1.22$ ,  $t_{23} = 6.83$ ,  
5 corrected  $p < 0.001$ ,  $d_z = 1.39$ ; two-tailed t-test, Bonferroni corrected for 2 comparisons). A  
6 three-way repeated measures ANOVA with reward (2), behavioral status (3) and ROI (7) as  
7 within-subject factors showed a significant main effect of reward ( $F_{1, 23} = 8.66$ ,  $p = 0.007$ ).  
8 There was an interaction of reward level and ROI ( $F_{6, 138} = 14.83$ ,  $p < 0.001$ ), with AI/FO, IPS,  
9 and preSMA showing reward effect following post-hoc tests and Bonferroni correction for  
10 multiple (7) comparisons (AI:  $t_{23} = 5.26$ ,  $p < 0.001$ ,  $d_z = 1.07$ ; IPS:  $t_{23} = 3.31$ ,  $p = 0.021$ ,  $d_z =$   
11  $0.68$ ; preSMA:  $t_{23} = 3.36$ ,  $p = 0.019$ ,  $d_z = 0.69$ ). The mMFG showed a reward effect that did  
12 not survive multiple comparisons ( $t_{23} = 2.26$ , uncorrected  $p = 0.037$ , corrected  $p = 0.26$ ,  $d_z =$   
13  $0.46$ ). Importantly, there was no main effect of behavioral status ( $F_{2, 46} = 2.25$ ,  $p = 0.12$ ) and  
14 no interaction of reward and behavioral status ( $F_{2, 46} = 0.52$ ,  $p = 0.6$ ). Overall, the univariate  
15 results indicated increased BOLD response with reward across large parts of the MD network  
16 with similar levels of activity for the three behavioral status conditions.

A

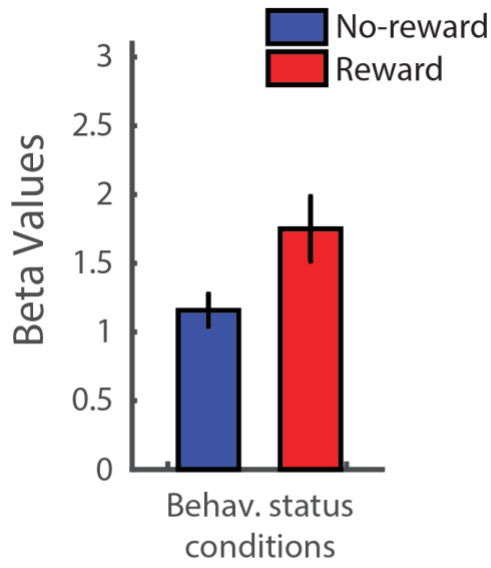

B

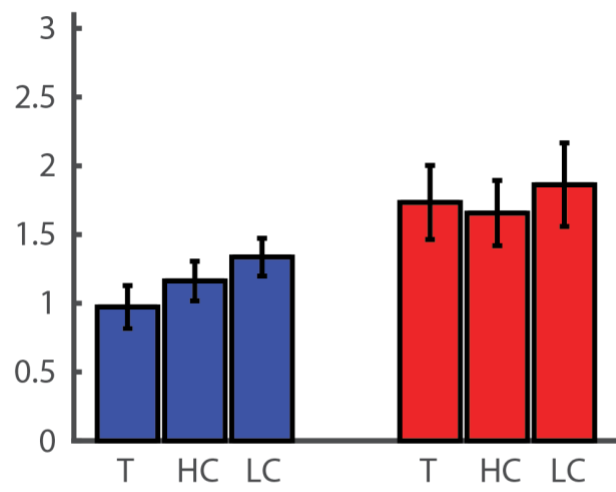

C

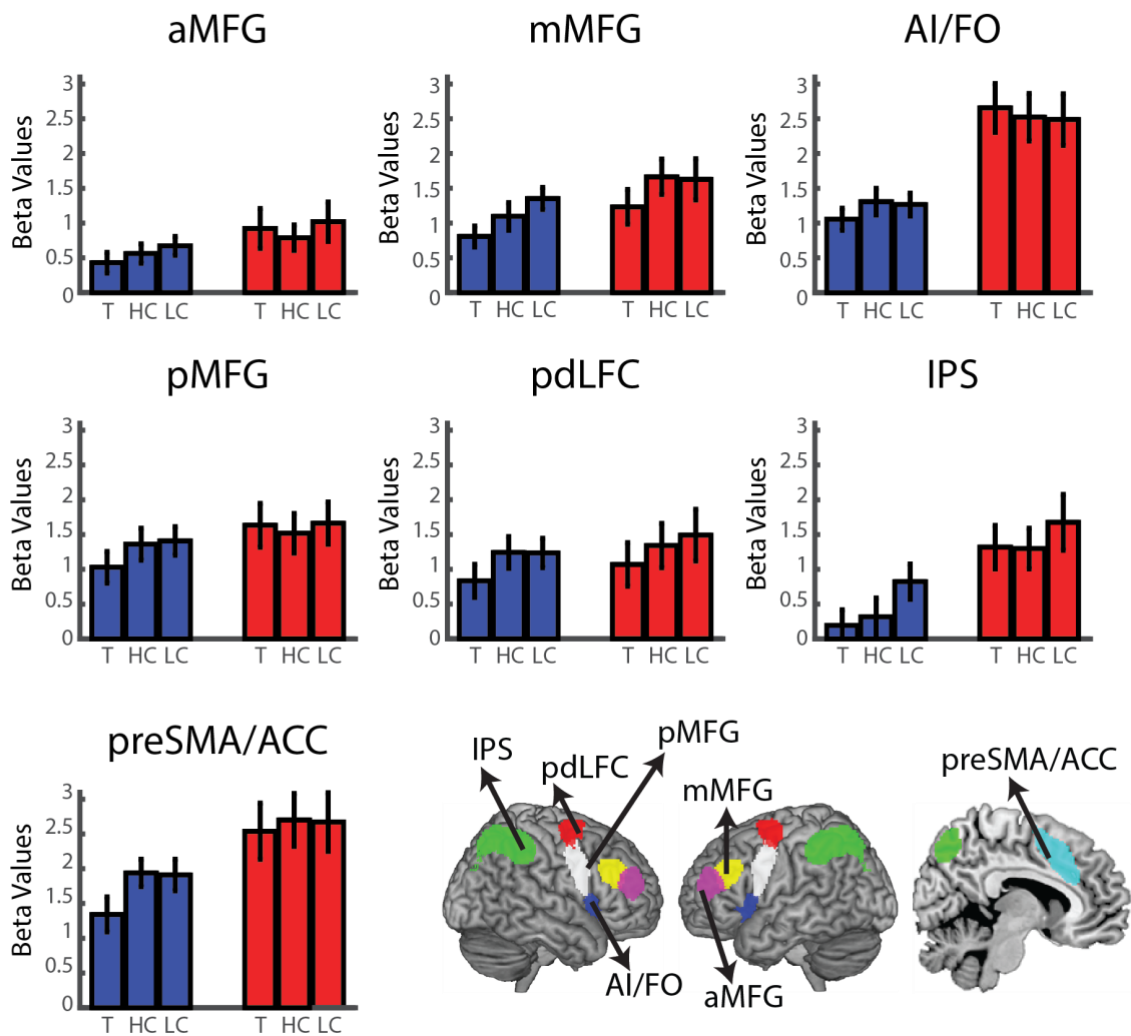

1

1 **Figure 3: Univariate activity across the MD network during the stimulus epoch. A.**  
2 Univariate results averaged across the subject-specific ROIs for all MD regions. Results are  
3 averaged across the behavioral status conditions for no-reward (blue bar) and reward (red bar)  
4 conditions. **B.** Average univariate activity across the MD network is shown separately for each  
5 behavioral status condition for no-reward (blue bars) and reward (red bars) conditions. T:  
6 Target, HC: High-conflict nontarget, LC: Low-conflict nontarget). **C.** Univariate results for the  
7 individual MD regions. Post-hoc tests showed that activity increased with reward in the AI/FO,  
8 IPS and preSMA, as well as an increase in mMFG that did not survive correction for multiple  
9 comparisons. The MD network template is shown for reference. pdLFC: posterior/dorsal lateral  
10 prefrontal cortex, IPS: intraparietal sulcus, preSMA: pre-supplementary motor area, ACC:  
11 anterior cingulate cortex, AI: anterior insula, FO: frontal operculum, aMFG, mMFG, pMFG:  
12 anterior, middle and posterior middle frontal gyrus, respectively. Error bars indicate S.E.M.

13

### 14 3.4 Effect of reward motivation on discrimination of task-related behavioral 15 status in the MD network

16

17 Our main question concerned the representation of task-related behavioral status information  
18 across the MD network and its modulation by reward, and we used MVPA to address that. For  
19 each participant and subject-specific ROI, we computed the classification accuracy above  
20 chance (50%) for the distinctions between Target vs. High-conflict nontarget, Target vs. Low-  
21 conflict nontarget and High-conflict vs. Low-conflict nontargets, separately for no-reward and  
22 reward conditions (Figure 4). The analysis was set to test for discrimination between behavioral  
23 status conditions within each reward level, and whether these discriminations are larger when  
24 reward is introduced compared to the no-reward condition. A three-way repeated-measures  
25 ANOVA with reward (2), behavioral distinction (3) and ROI (7) as within-subject factors  
26 showed no main effect of ROI ( $F_{6, 138} = 0.97, p = 0.45$ ) or any interaction of ROI with reward

1 and behavioral distinction ( $F < 1.16$ ,  $p > 0.31$ ). Therefore, the classification accuracies were  
2 averaged across ROIs for further analysis (Figure 4A). First, we looked at the overall  
3 discrimination of behavioral status pairs. Averaged across the three pairs of behavioral status,  
4 decoding accuracies were (mean  $\pm$  SD)  $51.4\% \pm 2.8\%$  and  $51.8\% \pm 3.5\%$  for the no-reward  
5 and reward conditions, respectively. Decoding levels were above chance (50%) for both the  
6 no-reward and reward trials (one-tailed t-test against chance, corrected for 2 comparisons, no-  
7 reward:  $t_{23} = 2.34$ , corrected  $p = 0.03$ ,  $d_z = 0.48$ ; reward:  $t_{23} = 2.5$ , corrected  $p = 0.02$ ,  $d_z = 0.5$ ).  
8 The decoding levels above chance for the individual pairs of behavioral status for the no-reward  
9 and reward conditions are summarized in Table 1. Overall, our results show that on average  
10 behavioral status distinctions are represented across the MD network in both no-reward and  
11 reward conditions, with some differences between individual pairs of behavioral status.

12 In our critical analysis we tested for the modulatory effect of reward on the discriminability  
13 between pairs of behavioral status. In contrast to our prediction, a two-way repeated measures  
14 ANOVA with reward (2) and behavioral distinction (3) as within-subject factors showed no  
15 main effects of reward or behavioral distinction ( $F_{1, 23} = 0.26$ ,  $p = 0.6$ ;  $F_{2, 46} = 1.37$ ,  $p = 0.26$ ,  
16 respectively), and no interaction of the two ( $F_{2, 46} = 0.74$ ,  $p = 0.48$ ). In contrast to our prediction,  
17 decoding levels across behavioral status pairs were not larger for reward trials compared to no-  
18 reward trials (one-tailed paired t-test:  $t_{23} = 0.52$ ,  $p = 0.3$ ,  $d_z = 0.44$ ). To test for the specific  
19 prediction that reward might increase discrimination for the high conflict pair of conditions  
20 that may not have been picked up by the ANOVA, we compared decoding levels for the Target  
21 vs. High-conflict nontarget for the no-reward and reward conditions. Classification accuracy  
22 was not larger in the reward trials compared to the no-reward trials for the Target vs. High-  
23 conflict nontarget distinction (One-tailed paired t-test:  $t_{23} = 1.07$ ,  $p = 0.15$ ,  $d_z = 0.22$ ). A post-  
24 hoc sensitivity power analysis yielded an effect size of  $d_z = 0.52$  as the minimum detectable  
25 effect. In summary, although the average decoding levels of behavioral status were above

- 1 chance across the MD network, we did not find increases in decodability with reward. The
- 2 study had sufficient power to detect a reward modulation with a moderate effect size of 0.52
- 3 or more, but not a smaller one.



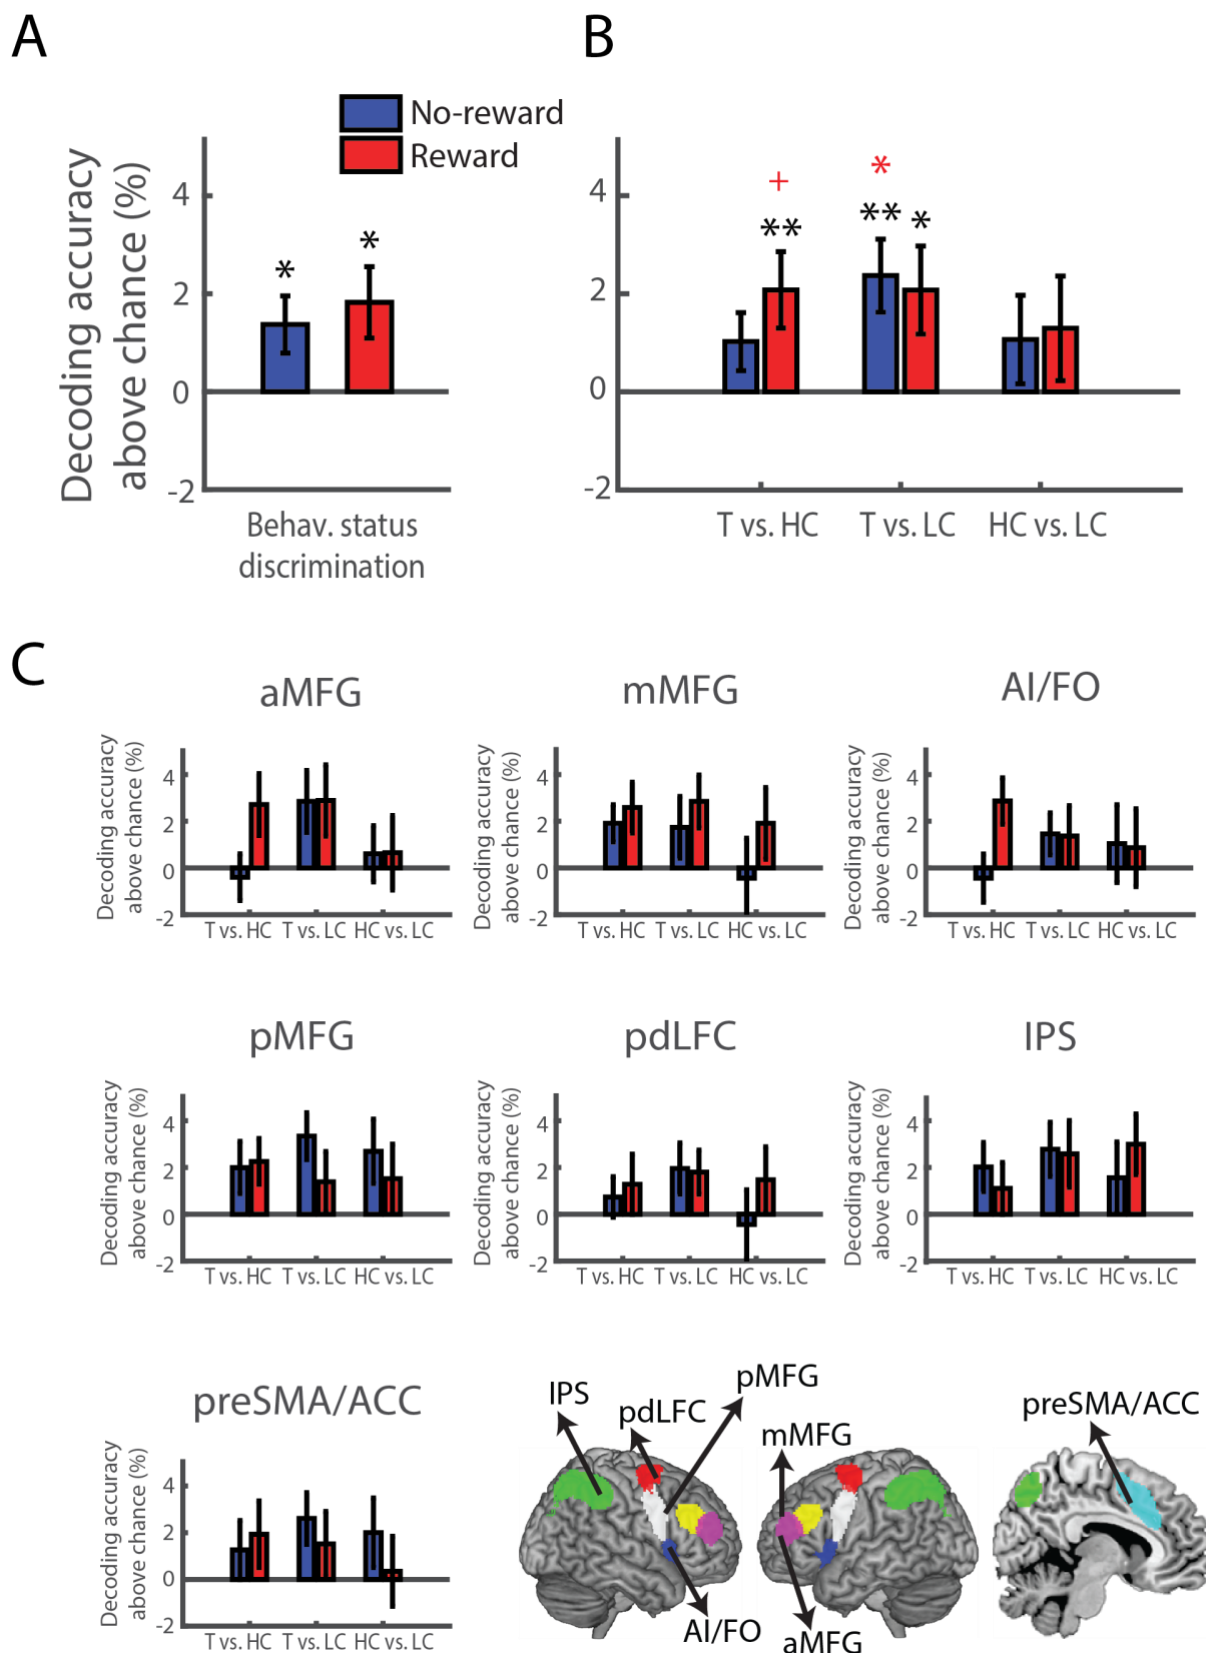

1  
 2 **Figure 4: Reward does not modulate distinctions of behavioral status across the MD**  
 3 **network. A.** Classification accuracy is presented as percentage above chance (50%), averaged

1 across all MD regions and behavioral status pairs, for no-reward (blue bars) and reward (red  
2 bars) trials. Behavioral status was decodable but not modulated by reward. Asterisks above  
3 bars show significant decoding above chance (One-tailed, Bonferroni corrected for 2  
4 comparisons). **B.** The data in A is shown separately for the three distinctions of Target vs.  
5 High-conflict nontarget, Target vs. Low-conflict non-target, and High- vs. Low-conflict  
6 nontargets. T: Target, HC: High-conflict nontarget, LC: Low-conflict nontarget. Asterisks  
7 above bars show one-tailed significant discrimination between behavioral categories above  
8 chance without correction (black), and Bonferroni corrected for multiple (6) comparisons (red).  
9 See Table 1 for details. **C.** Decoding results are shown for the individual MD regions. The MD  
10 network template is shown for reference. pdLFC: posterior/dorsal lateral prefrontal cortex, IPS:  
11 intraparietal sulcus, preSMA: pre-supplementary motor area, ACC: anterior cingulate cortex,  
12 AI: anterior insula, FO: frontal operculum, aMFG, mMFG, pMFG: anterior, middle and  
13 posterior middle frontal gyrus, respectively. Error bars indicate S.E.M. +  $p < 0.06$ , \*  $p < 0.05$ ,  
14 \*\*  $p < 0.01$ .

15  
16 We conducted several control analyses to confirm the robustness of the results across analysis  
17 choices. First, a similar pattern of results was evident across a range of ROI sizes (100, 150,  
18 250 and 300 voxels), confirming that the results do not depend on the choice of ROI size. A  
19 two-way repeated measures ANOVA with reward (2) and behavioral distinction (3) as within-  
20 subject factors showed no main effects of reward or behavioral distinction and no interaction  
21 of the two in any of the ROI sizes ( $F < 1.5$ ,  $p > 0.23$ ). Additionally, the classification accuracy  
22 of Targets vs. High-conflict nontargets was not larger in reward trials compared to no-reward  
23 trials in any of the ROI sizes (one-tailed paired t-test:  $t_{23} < 1.17$ ,  $p > 0.13$ ,  $d_z < 0.24$ ).  
24 Second, to demonstrate that the results do not depend on our choice to use subject-specific  
25 ROIs, we repeated the analysis using the entire MD network template. Overall, the results were

1 similar to those obtained using the subject-specific ROIs. Averaged across all MD ROIs,  
2 discrimination of behavioral status was significantly above chance for both no-reward and  
3 reward trials (no-reward:  $51.6\% \pm 2.9\%$ ,  $t_{23} = 2.65$ , corrected  $p = 0.014$ ,  $d_z = 0.54$ ; reward  
4  $52.22\% \pm 4\%$ ,  $t_{23} = 2.73$ , corrected  $p = 0.012$ ,  $d_z = 0.56$ ; one-tailed t-test against chance,  
5 Bonferroni corrected for 2 comparisons). A two-way repeated measures ANOVA with reward  
6 (2) and behavioral distinction (3) as within-subject factors showed no effect of reward or  
7 behavioral distinction ( $F_{1, 23} = 0.44$ ,  $p = 0.51$ ;  $F_{2, 46} = 2.22$ ,  $p = 0.12$ , respectively), and no  
8 interaction of the two ( $F_{2, 46} = 1.21$ ,  $p = 0.31$ ). A specific comparison of classification accuracy  
9 for the Target vs. High-conflict nontarget distinction showed that decoding was not larger in  
10 the reward trials compared to the no-reward trials (One-tailed paired t-test:  $t_{23} = 1$ ,  $p = 0.16$ ,  $d_z$   
11  $= 0.21$ ).

12 Third, we used another multivariate discriminability measure, linear discriminant contrast  
13 (LDC), to assess the difference in dissimilarity of distributed patterns of activity of the  
14 behavioral status pairs with and without reward. A larger LDC value for a pair of conditions  
15 indicates greater pattern dissimilarity between them, i.e., greater discriminability, with zero  
16 indicating no discriminability. Overall, the LDC results were highly similar to decoding results.  
17 Behavioral status pairs were significantly discriminable across the MD network in the reward  
18 condition and marginally significant after correction in the no-reward condition (averaged  
19 across MD ROIs and the three behavioral status pairs, one-tailed t-test against zero, corrected  
20 for 2 comparisons, no-reward:  $t_{23} = 1.92$ , corrected  $p = 0.068$ ,  $d_z = 0.39$ ; reward:  $t_{23} = 3.09$ ,  
21 corrected  $p = 0.005$ ,  $d_z = 0.63$ ). The discriminability above chance as obtained with LDC (i.e.,  
22 above zero) for the individual pairs of behavioral status for the no-reward and reward  
23 conditions were again highly consistent with the decoding results. Discriminability above  
24 chance when uncorrected for multiple comparisons was significantly above chance for Targets  
25 vs. High-conflict nontargets and Targets vs. Low-conflict nontargets, for both no-reward and

1 reward conditions (one-tailed t-test:  $t_{23} > 1.91$ ,  $p < 0.035$ ), but not for High- vs. Low-conflict  
2 nontargets (one-tailed t-test:  $t_{23} < 1.5$ ,  $p > 0.075$ ). Discriminations between Targets vs. High-  
3 conflict nontargets in the reward condition, and Targets vs. Low-conflict nontargets in the no-  
4 reward condition survived Bonferroni correction for 6 comparisons (corrected  $p < 0.016$ ; for  
5 the other comparisons: corrected  $p > 0.1$ ).

6 To test for the effect of reward on pattern discriminability of behavioral status as measured  
7 with LDC, we used a two-way repeated measures ANOVA with reward (2) and behavioral  
8 distinction (3) as within-subject factors. There were no effects of reward or behavioral  
9 distinction ( $F_{1, 23} = 1.03$ ,  $p = 0.32$ ;  $F_{2, 46} = 0.96$ ,  $p = 0.39$ , respectively), and no interaction of  
10 the two ( $F_{2, 46} = 1.36$ ,  $p = 0.27$ ), demonstrating that discriminability was not different between  
11 the reward and the no-reward conditions. A further specific comparison of discriminability  
12 between Targets and High-conflict nontargets showed a trend of larger pattern dissimilarity for  
13 the reward compared to the no-reward condition (one-tailed paired t-test:  $t_{23} = 1.59$ ,  $p = 0.06$ ,  $d_z$   
14  $= 0.33$ ).

15 Fourth, we conducted a complementary whole-brain searchlight analysis to test for increased  
16 discriminability of behavioral status with reward across the brain. In a second-level random-  
17 effects analysis of behavioral status classification maps (average across the three pairs of  
18 behavioral status) of reward vs. no-reward conditions, none of the voxels survived an FDR  
19 threshold of  $p < 0.05$ . A separate searchlight analysis for classification of Targets vs. High-  
20 conflict nontargets showed similar results, with no voxels surviving FDR correction ( $p < 0.05$ ).  
21 Therefore, this analysis did not reveal any other brain regions that showed increase in  
22 discriminability with reward.

23 Fifth, to ensure that our results do not depend on accounting for RT in the GLM regressors, we  
24 repeated the analysis using regressors for the stimulus phase with fixed duration (delta  
25 function). All the other GLM regressors remained as before. A two-way repeated measures

1 ANOVA with reward (2) and behavioral distinction (3) as within-subject factors showed no  
2 main effects of reward or behavioral distinction ( $F_{1, 23} = 0.04, p = 0.84$ ;  $F_{2, 46} = 0.85, p = 0.44$ ,  
3 respectively), and no interaction of the two ( $F_{2, 46} = 0.68, p = 0.51$ ). There was no increase in  
4 classification accuracy in the specific comparison of the Target vs. High-conflict nontarget  
5 distinction in reward trials compared to the no-reward trials (One-tailed paired t-  
6 test:  $t_{23} = 0.6, p = 0.28, d_z = 0.12$ ).

7  
8 Lastly, as a quality check for the data and analysis pipeline, we classified right vs. button  
9 presses in two motor regions, the precentral gyrus and the supplementary motor cortex.  
10 Decoding accuracies averaged across no-reward and reward conditions were high and  
11 significantly above chance (50%) in both regions, as would be expected, thus providing support  
12 for the good quality of the data and the analysis procedure. (precentral gyrus:  $75.35\% \pm 9.65\%$ ,  
13  $t_{23} = 12.88$ , corrected  $p = 0.001, d_z = 2.63$ ; supplementary motor cortex:  $81.6\% \pm 12.88\%$ ,  $t_{23}$   
14  $= 12.02$ , corrected  $p = 0.001, d_z = 2.45$ ; one-tailed t-test against chance, Bonferroni corrected  
15 for 2 comparisons).

16

### 17 3.5 Effects of reward motivation on task-related behavioral status in LOC

18

19 It is widely accepted that the frontoparietal MD network exerts top-down control on visual  
20 areas, contributing to task-dependent processing of information. As a comparison to the MD  
21 network, we performed similar univariate and multivariate analyses during the stimulus epoch  
22 in the high-level general-object visual region, the lateral occipital complex (LOC), separately  
23 for its two sub-regions, LO and pFs. We report decoding in subject-specific ROIs driven by  
24 the visual categories themselves, as would be expected in LOC, in the following sections.

25 We first conducted univariate analysis to test for an effect of reward and behavioral status on  
26 overall activity in LOC. A four-way repeated-measures ANOVA with reward (2), behavioral

1 status (3), ROI (2), and hemisphere (2) as within-subject factors showed no main effect of  
2 reward ( $F_{1,23} = 2.15$ ,  $p = 0.16$ ), a main effect of ROI ( $F_{1,23} = 14.70$ ,  $p < 0.001$ ), and a main effect  
3 of hemisphere ( $F_{1,23} = 14.97$ ,  $p < 0.001$ ). There was an interaction of reward and ROI ( $F_{1,23} =$   
4  $12.5$ ,  $p = 0.002$ ), and post-hoc tests with correction for multiple (2) comparisons showed that  
5 activity was larger for reward compared to no-reward trials in LO (Two-tailed t-test:  $t_{23} =$   
6  $2.55$ ,  $p = 0.036$ ,  $d_z = 0.52$ ), but not in pFs (Two-tailed t-test:  $t_{23} = 0.028$ ,  $p > 0.9$ ,  $d_z =$   
7  $0.006$ ). There was a main effect of behavioral status ( $F_{2,46} = 6.92$ ,  $p = 0.002$ ), but importantly  
8 there was no interaction of behavioral status and reward ( $F_{2,46} = 0.73$ ,  $p = 0.50$ ). Altogether,  
9 the univariate results show that reward effects in LOC were partial and limited to LO.

10 We then tested for the representation of the behavioral status conditions in LOC (Figure 5).  
11 Decoding levels averaged across all pairs of behavioral status and the two LOC ROIs were  
12 above chance for both no-reward and reward conditions (mean  $\pm$  SD:  $53.23\% \pm 3.64\%$  and  
13  $53.76\% \pm 4.14\%$  for the no-reward and reward conditions, respectively. One-tailed t-test  
14 against chance, corrected for 2 comparisons, no-reward:  $t_{23} = 4.34$ , corrected  $p < 0.001$ ,  $d_z =$   
15  $0.9$ ; reward:  $t_{23} = 4.45$ , corrected  $p < 0.001$ ,  $d_z = 0.9$ ). Importantly, decoding levels were not  
16 larger for the reward conditions compared to the no-reward conditions for any of the behavioral  
17 status distinctions, with similar results for both LO and pFs. A four-way repeated-measures  
18 ANOVA with reward (2), behavioral distinction (3), ROIs (2) and hemispheres (2) as within-  
19 subject factors showed no main effect of reward ( $F_{1,23} = 0.34$ ,  $p = 0.56$ ) or interaction of reward  
20 and ROI ( $F_{1,23} = 1.14$ ,  $p = 0.29$ ). No other main effects or interactions were significant ( $F <$   
21  $3.15$ ,  $p > 0.05$ ). Overall, these results demonstrate that reward did not modulate the coding of  
22 the task-related behavioral status distinctions in LOC.

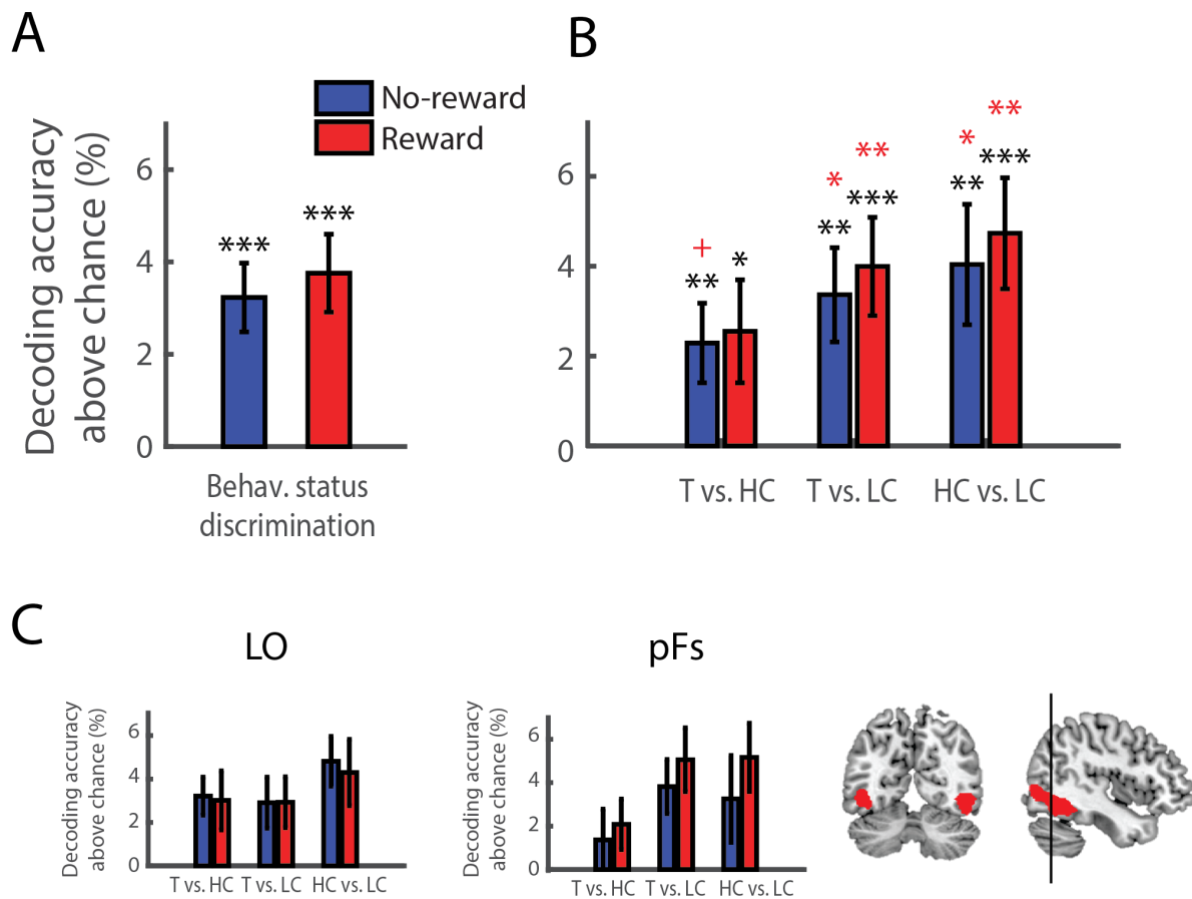

1  
2 **Figure 5: Reward motivation does not increase coding of behavioral status in LOC. A.**  
3 Classification accuracy averaged across all behavioral status pairs is presented as percentage  
4 above chance (50%), averaged across LO and pFS and both hemispheres. Classification  
5 accuracies for no-reward (blue bars) and reward (red bars) conditions are similar and above  
6 chance. Asterisks above bars show significant decoding level above chance, (one-tailed  
7 Bonferroni corrected for 2 comparisons). B. Classification accuracies are similar for all three  
8 behavioral status distinctions. T: Target, HC: High-conflict nontarget, LC: Low-conflict  
9 nontarget. Asterisks above bars show one-tailed significant discrimination between behavioral  
10 categories above chance without correction (black), and corrected for multiple (6) comparisons  
11 (red). C. Classification accuracies for LO and pFs are presented separately, averaged across  
12 hemispheres. The LOC template is shown on sagittal and coronal planes, with a vertical line

1 dividing it into posterior (LO) and anterior (pFs) regions. Error bars indicate S.E.M. +  $p < 0.06$ ,  
2 \*  $p < 0.05$ , \*\*  $p < 0.01$ , \*\*\*  $p < 0.001$ .

3

### 4 3.6 Conflict-contingent vs. visual category effects

5

6 An important aspect of the Target and High-conflict nontarget conditions in this experiment  
7 was that they both contained the same visual categories, which could be either a target or a  
8 nontarget (Figure 1B). Therefore, the Target vs. High-conflict nontarget pairs of conditions in  
9 our decoding analysis included cases where the stimuli in the two conditions were items from  
10 different visual categories (e.g. shoe and sofa following a ‘shoe’ cue), as well as cases where  
11 the two stimuli were items from the same visual category (e.g. shoe following a ‘shoe’ cue and  
12 a ‘sofa’ cue). We further investigated whether the representation in the MD network and in the  
13 LOC was driven by the task-related high conflict nature of the two conditions or by the different  
14 visual categories of the stimuli, and whether there was a facilitative effect of reward which is  
15 limited to the representation of the visual categories. Figure 6A shows Target vs. High-conflict  
16 nontarget distinctions for no-reward and reward conditions, presented separately for pairs of  
17 conditions in which the stimuli belonged to the same visual category (different cue trials), and  
18 for pairs in which the stimuli belonged to different visual categories (same cue trials), for both  
19 the MD and LOC. The data in the figure is the same as in Figure 5 for LOC. For MD, we  
20 repeated the same analysis as shown in Figure 4, except for selecting 180 voxels in each  
21 subject-specific ROI, in order to keep the ROI size the same for MD and LOC. For both MD  
22 and LOC regions, there was no interaction with ROI or hemisphere, therefore accuracy levels  
23 were averaged across hemispheres and ROIs for the MD network and LOC (repeated measures  
24 ANOVA with reward (2), distinction type (2, same or different visual category), ROIs (7 for  
25 MD, 2 for LOC) and hemispheres (2, just for LOC) as within-subject factors:  $F < 3.15$ ,  $p >$   
26  $0.05$  for all interactions with ROI and hemisphere).



1 We next tested for the effect of reward and distinction type (same or different visual category)  
2 on decoding levels in each the two systems. In the MD network, a two-way repeated measures  
3 ANOVA with reward (2) and distinction type (2) as factors showed no main effect of reward  
4 ( $F_{1, 23} = 0.92, p = 0.35$ ) and no effect of category distinction or their interaction ( $F_{1, 23} = 2.9, p$   
5  $= 0.1; F_{1, 23} = 0.1, p = 0.8$ , respectively). These results show that there was no effect of reward  
6 on high conflict items that may be specific for the distinction between visual categories. In  
7 contrast, a similar ANOVA for LOC showed a main effect of distinction type ( $F_{1, 23} = 25.9, p$   
8  $< 0.001$ ) and no effect of reward or their interaction ( $F_{1, 23} = 0.05, p = 0.8; F_{1, 23} = 0.46, p =$   
9  $0.50$ , respectively). Together, these results demonstrate that representation was driven by visual  
10 categories in LOC, but not in the MD network. To further establish this dissociation between  
11 the two systems, we used a three-way repeated measures ANOVA with distinction type (2,  
12 same or different visual category), reward (2), and brain system (2, MD or LOC) as within-  
13 subject factors. There was no main effect of brain system ( $F_{1, 23} = 1.2, p = 0.3$ ), allowing us to  
14 compare between the two systems. An interaction between distinction type and system ( $F_{1, 23}$   
15  $= 16.7, p < 0.001$ ) confirmed that decoding levels in the two systems were affected differently  
16 by visual category. Critically, reward did not lead to increased decoding in either of the systems  
17 (no main effect of reward or interactions with reward:  $F < 0.77, p > 0.39$ ).

18

19

### 20 3.7 Representation of visual categories

21

22 While the main focus of the study was the representation of behavioral status, we further tested  
23 whether information about the visual categories themselves is represented across the MD  
24 network and in LOC and whether this representation is modulated by reward. Figure 6B shows  
25 accuracy levels of visual categories when both have the same behavioral status, i.e. both  
26 Targets or both High-conflict nontargets, for no-reward and reward conditions, for both MD  
27 and LOC, averaged across ROIs and hemispheres. In the MD network, repeated measures

1 ANOVA with reward (2), behavioral status (Targets, High-conflict nontargets) and ROIs (7)  
2 as within-subject factors showed no main effect of reward ( $F_{1,23} = 0.25, p = 0.61$ ) or behavioral  
3 status ( $F_{1,23} = 2.38, p = 0.14$ ). There was a marginally significant interaction of behavioral  
4 status and ROI ( $F_{6,138} = 2.17, p = 0.049$ ), and post-hoc tests revealed greater decoding for  
5 Targets compared to High-conflict nontargets in the preSMA only (corrected  $p = 0.025$ ,  
6 corrected for 7 comparisons). Averaged across ROIs, decoding of visual category in the MD  
7 network was not above chance when the stimuli were either Targets or High-conflict  
8 nontargets, and for either no-reward or reward conditions ( $t_{23} < 1.73$ , corrected  $p > 0.19$ ). These  
9 results show that visual categories with the same behavioral status were not represented across  
10 the MD network, and this representation did not increase with reward.

11 In LOC, classification accuracies of visual categories averaged across ROIs and hemispheres  
12 was above chance for Targets in the no-reward condition (one-tailed t-test against chance,  
13 corrected for multiple (4) comparisons:  $t_{23} = 3.94$ , corrected  $p = 0.001$ ) and marginally above  
14 chance in the reward condition ( $t_{23} = 2.32$ , corrected  $p = 0.06$ ). For High-conflict nontargets,  
15 decoding was above chance in the reward condition ( $t_{23} = 3.11$ , corrected  $p = 0.01$ ) but not in  
16 the no-reward condition ( $t_{23} = 0.83$ , corrected  $p = 0.83$ ). Repeated measures ANOVA with  
17 reward (2), behavioral status (Targets, High-conflict nontargets), ROIs (2) and hemispheres (2)  
18 as within-subject factors showed no main effects or interactions ( $F < 3.94, p > 0.059$ ), except  
19 for an interaction of behavioral status and reward ( $F_{1,23} = 5.4, p = 0.03$ ). However, none of the  
20 post-hoc comparisons were significant (corrected  $p > 0.08$ , corrected for 2 comparisons).  
21 Overall, in contrast to the MD network, visual categories in LOC were decodable, at least in  
22 part. A further ANOVA demonstrated this dissociation between the systems, with larger  
23 accuracy levels in LOC compared to the MD network (repeated measures ANOVA with  
24 behavioral status (2), reward level (2) and brain system (2, MD or LOC) as within subject  
25 factors: main effect of system:  $F_{1,23} = 18.27, p < 0.001$ ; no other significant main effects or

1 interactions:  $F < 3.49$ ,  $p > 0.075$ ). Importantly, despite the larger decodability of visual  
 2 categories in LOC, there was no effect of reward in any of the systems.

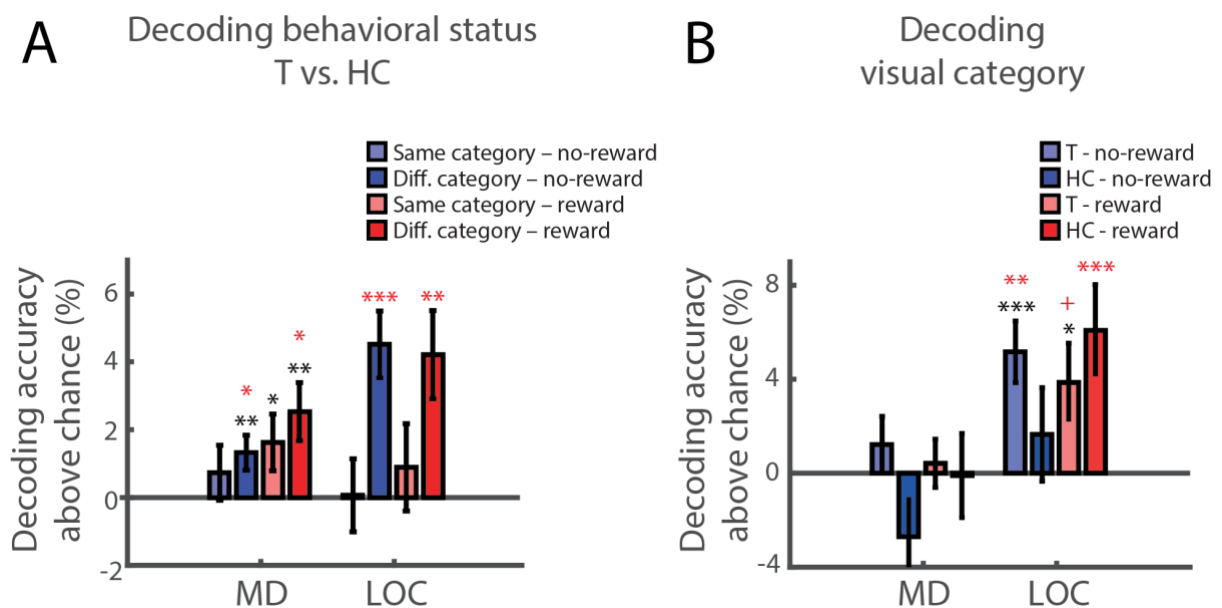

3

4 **Figure 6: Decoding of visual categories.** **A.** Decoding of highly conflicting behavioral status  
 5 distinctions in the MD network and LOC. Classification accuracies above chance (50%) are  
 6 presented for no-reward and same-visual-category distinctions (light blue), no-reward and  
 7 different-visual-category distinctions (dark blue), reward and same-visual-category  
 8 distinctions (light red), and reward and different-visual-category distinctions (dark red),  
 9 separately for the MD network and the LOC, averaged across regions and hemispheres in each  
 10 system. In the MD network, neither reward nor visual category modulated the discrimination  
 11 of Target vs. High-conflict nontarget. In contrast, classification accuracies in the LOC are  
 12 larger when the displayed objects are from two different visual categories compared to when  
 13 they belong to the same visual category, irrespective of the reward level. **B.** Decoding of visual  
 14 categories with the same behavioral status. Classification accuracies above chance (50%) are  
 15 presented for no-reward Target categories (light blue), no-reward High-conflict nontargets  
 16 (dark blue), reward Targets (light red), and reward High-conflict nontargets (dark red),  
 17 separately for the MD network and for the LOC, averaged across regions and hemispheres in

1 each system. Asterisks above bars show one-tailed significant discrimination above chance  
2 without correction (black), and corrected for multiple (4) comparisons (red). Error bars indicate  
3 S.E.M. +  $p < 0.06$ , \*  $p < 0.05$ , \*\*  $p < 0.01$ , \*\*\*  $p < 0.001$ .

4

## 5 **4. Discussion**

6

7 In this study we used a cued target detection task to test for the effect of reward motivation on  
8 the coding of task-relevant information in the frontoparietal MD network as reflected in  
9 distributed patterns of fMRI data. Reward motivation, in the form of monetary reward, led to  
10 overall increase in activity across large parts of the MD network. Using MVPA, we showed  
11 that information about the behavioral status during the stimulus epoch of a trial was represented  
12 across the MD network. However, in contrast to our prediction, reward motivation did not  
13 enhance the distinctions between the three behavioral status conditions across the MD network.  
14 Additionally, we did not find evidence for a selective facilitative effect of reward on  
15 discriminability of highly conflicting items (competition-contingent effect). In the LOC,  
16 information about the behavioral status of the presented stimuli was primarily driven by visual  
17 categories, as expected, and was not modulated by reward motivation.

18 Previous reports showed an enhancement effect of reward on overall activity in the  
19 frontoparietal control network (Botvinick and Braver, 2015; Dixon and Christoff, 2012;  
20 Padmala and Pessoa, 2011), in line with our data that showed increase in univariate activity  
21 with reward during both the cue and stimulus epochs. Our results replicated our previously  
22 reported findings that demonstrated the representation of behavioral status information across  
23 the frontoparietal cortex (Erez and Duncan, 2015), as measured by decoding distinctions  
24 between the behavioral status levels. However, despite increases in overall univariate activity  
25 with reward across the MD network, our results did not show an increase in representation in

1 reward trials, and we did not observe a selective increase in representation for the highly  
2 conflicting items, namely Targets vs. High-conflict nontargets. Recently, Hall-McMaster et al.,  
3 (2019) showed some increases in task-relevant stimulus features information when reward  
4 levels were high, using distributed patterns in EEG data. In the task used in the current study,  
5 we tested for representation of behavioral status of the presented items, rather than stimulus  
6 features. We did not observe changes in representation similar to the ones observed by Hall-  
7 McMaster et al. There may be several possible reasons for that, including the type of  
8 representations that were tested (features vs. behavioral status), multiple differences in the  
9 design that contribute to our ability to detect multivariate representations, low spatial  
10 specificity in the EEG data compared to the more focused ROIs in our fMRI study, and perhaps  
11 the most significant being the limited time window where such differences were observed in  
12 EEG that cannot be detected with the low temporal resolution fMRI data.

13 More generally, several reasons can provide potential explanations for the results obtained in  
14 our study, showing no facilitative effect of reward on pattern discriminability of behavioral  
15 status. Indeed, it is possible that in contrast to reward effects on overall activity, its effect on  
16 neural representations is limited to cue decoding when the task context is set, as has been  
17 previously demonstrated (Etzel et al., 2016), and does not extend to the stimulus phase when  
18 information is processed based on the cue. Another possibility may be related to the reward  
19 being offered on a trial-by-trial basis, which may not be sufficiently strong to generate  
20 detectable reward-related effects on decoding. It has been recently demonstrated that stable  
21 longer-term cue-reward associations that are learned prior to scanning lead to increased  
22 decoding of task-related information in visual and parietal areas (Tankelevitch et al., 2020).  
23 Other possible explanations may include a reward manipulation that was not sufficiently strong  
24 to make a difference to pattern discriminability, and multiple factors in the experimental design  
25 that make small effects hard to detect with current MVPA methods, particularly across the

1 frontoparietal cortex where low decoding accuracies are widely common for reasons that are  
2 not yet well understood (Bhandari et al., 2018). We note, however, that the results were  
3 consistent across several control analyses, including ROI size, multivariate discriminability  
4 measure, and whole-brain searchlight analysis. Beyond the above potential explanations,  
5 insufficient power is always a concern when reporting null results. A post-hoc sensitivity power  
6 analysis showed that the study had sufficient power to detect a moderate effect size with respect  
7 to reward modulation of decoding behavioral distinctions, but not a smaller one. For fMRI  
8 MVPA results in general, and more so given the sparse evidence in the literature relevant for  
9 our main research question, it is hard to establish an expected effect size. Therefore, a  
10 reasonable interpretation of our results would be that reward does not lead to moderate or large  
11 increase in decoding but could possibly lead to increased decoding if this is relatively small.  
12 We note that the study had sufficient power to detect univariate effects as well as other  
13 complementary pattern discriminations. First, our overall decoding levels for behavioral status  
14 were above chance, with decoding for the no-reward conditions similar to previously reported  
15 results (Erez and Duncan, 2015). Second, decoding in LOC showed a clear pattern of  
16 contingency on visual category representation, as expected in the visual cortex, in contrast to  
17 distinct pattern of decoding across the MD network that did not depend on the visual category  
18 of the presented items. Such decoding patterns in LOC are consistent with previous studies that  
19 showed only weak, or non-existing, task effects (Bugatus et al., 2017; Harel et al., 2014; Hebart  
20 et al., 2018). Lastly, in a control analysis we observed high decoding accuracies for motor  
21 responses (right vs. left button presses) in the motor cortex, as expected for these regions. This  
22 provides an indication for the quality of the data and the analysis procedure and demonstrates  
23 sufficient power to detect these responses.

24 Our predictions were based on the sharpening and prioritization account, which postulates that  
25 reward motivation leads to a sharpened neural representation of relevant information depending

1 on the current task and needs. Previous neurophysiological evidence provide support for this  
2 aspect: reward has been associated with firing of dopaminergic neurons (Bayer and Glimcher,  
3 2005; Schultz et al., 1997), and dopamine has been shown to modulate tuning of prefrontal  
4 neurons and to sharpen their representations (Ott and Nieder, 2016; Thurley et al., 2008;  
5 Vijayraghavan et al., 2007). The prioritization aspect can be related to the expected value of  
6 control (EVC) theory (Shenhav et al., 2013) and reward-based models for the interaction of  
7 reward and cognitive control, essentially a cost-benefit trade-off (Botvinick and Braver, 2015).  
8 Cognitive control is effortful and hence an ideal system would allocate it efficiently, with a  
9 general aim of maximizing expected utility. Despite the appeal of this account, our results did  
10 not show experimental support for this view. At the behavioral level though, we observed some  
11 evidence for such a benefit of reward. Accuracy levels of performance in the task for Target  
12 trials were higher in the reward compared to the no-reward condition. Additionally, while in  
13 the no-reward condition Target trials were less accurate than Low-conflict nontargets, as is  
14 well established in the visual search literature (Schneider and Fisk, 1983; Shiffrin and  
15 Schneider, 1977), there were no differences between them in the reward condition. We did not  
16 observe a similar benefit in reaction times, most likely due to the time threshold that we used  
17 for reward trials, which reduced the reaction time on all the reward trials and may have masked  
18 an interaction with reward.

19 The nature of the conflict addressed in our study concerns the effect of current task goals (i.e.,  
20 cue) on the behavioral relevance and processing of the presented stimuli. This is a fundamental  
21 aspect of cognitive control which have been addressed by us and others in the field in different  
22 ways, both in human and non-human primate studies (Erez and Duncan, 2015; Freedman et al.,  
23 2001; Hall-McMaster et al., 2019; Kadohisa et al., 2015). There are several other important  
24 aspects of the potential effect of reward motivation on goal-directed information processing  
25 that cannot be addressed in our data and may be addressed in future studies. For example, one

1 aspect is related to how reward motivation may bias response towards reward-associated  
2 stimuli when stimuli are presented simultaneously and compete for attention. Another aspect  
3 is how reward motivation may affect encoding of visual features of the stimulus, e.g., as can  
4 be tracked using inverted encoding models (Myers et al., 2015; Sprague et al., 2016). These  
5 aspects are complementary and provide different perspectives to better understand control  
6 processes.

7 The visual categorization aspect of our task allowed us to investigate effects of reward on  
8 representation in LOC compared to the MD network, and in particular whether there is a  
9 specific effect of reward that is driven by visual differences. In the MD network, decoding  
10 levels were similar between conditions with the same visual category and different visual  
11 category, and there was no modulation by reward in any of them. In contrast, the discrimination  
12 in LOC was driven by the visual categories, as expected in the visual cortex, with Targets and  
13 High-conflict nontargets being discriminable only when items belonged to two different visual  
14 categories. In a complementary analysis, we tested for representation of the visual categories  
15 themselves, while keeping the behavioral status fixed, i.e., when both stimuli are Targets or  
16 both are High-conflict nontargets. As expected, decoding levels of visual categories were larger  
17 in LOC compared to MD. Additionally, visual categories with the same behavioral status were  
18 not represented in the MD network, in line with previously reported findings (Erez and Duncan,  
19 2015). Importantly, reward did not lead to increased decodability of the visual categories in  
20 either the MD network or in the LOC. While it is widely agreed that the frontoparietal cortex  
21 exerts top-down effects on visual areas, there is no clear prediction as to whether any effects  
22 of reward should be observed in the visual cortex. Our results provide evidence that the effects  
23 of reward were not present in LOC. Previous studies have shown differences in representations  
24 between pFs and LO (Harel et al., 2014; Jiang et al., 2007; Li et al., 2007), however, our results  
25 were similar for both regions.



1 Although our primary question addressed the representation of task-related information during  
2 the integration of stimulus and cue, we also tested for an effect of reward in the cue epoch. The  
3 use of catch trials ensured that the cue and stimulus GLM regressors were appropriately  
4 decorrelated. The overall univariate activity across the MD network increased with reward  
5 during the cue epoch, possibly reflecting an increase in cognitive effort due to the reward.  
6 However, we did not observe cue decoding above chance, in contrast to previously reported  
7 results (Etzel et al., 2016). One reason for this difference may be related to the design of the  
8 current task. We used words of the category names as cues, which appeared together at the  
9 same time with the no-reward/reward indication – the reward trial cues had additional red  
10 pound signs. The choice of words as cues allowed for high task performance (compared to  
11 using abstract symbols, which is more difficult), as confirmed in pilot experiments. This may  
12 have come at the expense of cue decodability, which was not the focus of the study. The  
13 visually salient reward signal presented simultaneously with the cues may have also  
14 contributed to reduced cue decoding levels, and the longer delay period in their study probably  
15 led to longer active maintenance of the task rule in working memory. Other reasons for the  
16 different results compared to Etzel et al. may be related to the size of the effect and our ability  
17 to detect it. The effect of reward on cue decoding reported by Etzel et al. was observed across  
18 all ROIs, but was inconsistent in individual ROIs, with only one region showing a significant  
19 difference between reward and no-reward conditions. Even for decoding across all ROIs,  
20 statistical significance was reached in one statistical test but was only marginal in another. It  
21 could be that the effect of reward on cue decoding is relatively small and therefore hard to  
22 detect. Among others, our ability to detect such effect may be affected by the areas chosen,  
23 number of trials and runs completed per subject etc. The contributions of many of these factors  
24 to decoding levels in the frontoparietal network more generally are not yet well understood  
25 (Bhandari et al., 2018). The similarities and differences in task design and results that we report

1 here together with those reported previously (Etzel et al., 2016) may be used to better  
2 understand the factors that affect decoding levels of contextual cues across the frontoparietal  
3 network and inform future studies. Enhancement of cue decoding following reward was also  
4 recently reported using EEG (Hall-McMaster et al., 2019). This facilitative effect was observed  
5 for ‘switch’ trials but not ‘stay’ trials. Our study design was not controlled for ‘switch’ and  
6 ‘stay’ trials, and it could be that cue decoding would emerge if these could be considered. An  
7 additional prominent difference between the EEG results and ours is the spatial specificity,  
8 with much more widespread activity contributing to decoding in EEG data.

9 There is a growing interest of the scientific community in the interaction between reward  
10 motivation and control processes, its neural correlates, and its implementation in computational  
11 models of reinforcement learning. Here, we report increases in overall univariate activity with  
12 reward but primarily null results for an effect of reward on task-related representations across  
13 the frontoparietal network and we believe that these results may be useful for future studies  
14 that seek to address similar questions. Our findings point out that the extent of effects of reward  
15 on neural representation may be limited and dependent on specific task demands and trial  
16 epochs. Limited effects were also reported by Hall-McMaster et al., (2019), where increased  
17 cue decoding was observed only when the cue changed from one trial to another, but not in  
18 trials where the cue remained the same. Reports on the effect of reward on task representation  
19 are so far limited, and with the movement towards open and replicable science, it is important  
20 to establish the best possible pool of evidence for such effects. Our results will ultimately  
21 contribute to the overall estimates of the extent of effects of reward on neural representation.  
22 Additionally, they may be used as a starting point for future studies and particularly for power  
23 estimates, with respect to both the expected effect size as well as aspects of the experimental  
24 design that may contribute to the detectability of reward effects. Different measures can be  
25 taken to further increase power within scanning time limits. These might include, but not

1 limited to, collecting a larger amount of data per participant, possibly over more than one  
2 scanning session, as well as using other methods that have been used recently to address neural  
3 representation for fMRI data such as repetition suppression (Garvert et al., 2015).

4

## 5 Conclusions

6

7 With growing interest in the interaction between control processes and reward motivation, our  
8 study provides important experimental evidence for the limited extent of effects of reward on  
9 task-relevant neural representations. Future studies will be required to further investigate the  
10 factors that determine how and when reward shapes neural representations and the mechanisms  
11 that underlie the profound effects of reward on behavior.

## 1 Acknowledgements

2 This work was supported by a Royal Society Dorothy Hodgkin Research Fellowship (UK) to  
3 Yaara Erez (DH130100); a Gates Cambridge Trust (Cambridge, UK) scholarship to Sneha  
4 Shashidhara; and the Medical Research Council (UK) (Intramural Program MC-A060-5PQ10).  
5 We thank John Duncan and Daniel Mitchell for fruitful discussions and advice throughout the  
6 study. The funding sources had no involvement in any aspects of the study.

7

## 8 Declaration of interests

9 None.

10

11

## 1 References

- 2 Allefeld, C., Görden, K., Haynes, J.D., 2016. Valid population inference for information-  
3 based imaging: From the second-level t-test to prevalence inference. *Neuroimage* 141,  
4 378–392. <https://doi.org/10.1016/j.neuroimage.2016.07.040>
- 5 Bayer, H.M., Glimcher, P.W., 2005. Midbrain Dopamine Neurons Encode a Quantitative  
6 Reward Prediction Error Signal. *Neuron* 47, 129–141.  
7 <https://doi.org/10.1016/J.NEURON.2005.05.020>
- 8 Bhandari, A., Gagne, C., Badre, D., 2018. Just above chance: Is it harder to decode  
9 information from prefrontal cortex hemodynamic activity patterns? *J. Cogn. Neurosci.*  
10 30, 1473–1498. [https://doi.org/10.1162/jocn\\_a\\_01291](https://doi.org/10.1162/jocn_a_01291)
- 11 Botvinick, M., Braver, T.S., 2015. Motivation and Cognitive Control: From Behavior to  
12 Neural Mechanism. *Annu. Rev. Psychol.* 66, 80–113. [https://doi.org/10.1146/annurev-  
13 psych-010814-015044](https://doi.org/10.1146/annurev-<br/>13 psych-010814-015044)
- 14 Brainard, D.H., 1997. The Psychophysics Toolbox . *Spat. Vis.* 10, 433–436.
- 15 Braver, T.S., 2012. The variable nature of cognitive control: A dual mechanisms framework.  
16 *Trends Cogn. Sci.* 16, 106–113. <https://doi.org/10.1016/j.tics.2011.12.010>
- 17 Brett, M., Anton, J.-L., Valabregue, R., Poline, J.-B., 2002. Region of interest analysis using  
18 an SPM toolbox [abstract]. Presented at the 8th International Conference on Functional  
19 Mapping of the Human Brain. *Neuroimage* 16, abstract 497.
- 20 Bugatus, L., Weiner, K.S., Grill-Spector, K., 2017. Task alters category representations in  
21 prefrontal but not high-level visual cortex. *Neuroimage* 155, 437–449.  
22 <https://doi.org/10.1016/J.NEUROIMAGE.2017.03.062>
- 23 Carlin, J.D., Kriegeskorte, N., 2017. Adjudicating between face-coding models with

- 1 individual-face fMRI responses. *PLoS Comput. Biol.* 13, e1005604.  
2 <https://doi.org/10.1371/journal.pcbi.1005604>
- 3 Chiew, K.S., Braver, T.S., 2014. Dissociable influences of reward motivation and positive  
4 emotion on cognitive control. *Cogn. Affect. Behav. Neurosci.* 14, 509–529.  
5 <https://doi.org/10.3758/s13415-014-0280-0>
- 6 Cole, M.W., Ito, T., Braver, T.S., 2016. The Behavioral Relevance of Task Information in  
7 Human Prefrontal Cortex. *Cereb. Cortex* 26, 2497–2505.  
8 <https://doi.org/10.1093/cercor/bhv072>
- 9 Cusack, R., Vicente-Grabovetsky, A., Mitchell, D.J., Wild, C.J., Auer, T., Linke, A.C.,  
10 Peelle, J.E., 2014. Automatic analysis (aa): efficient neuroimaging workflows and  
11 parallel processing using Matlab and XML. *Front. Neuroinform.* 8, 90.  
12 <https://doi.org/10.3389/fninf.2014.00090>
- 13 Desikan, R.S., Ségonne, F., Fischl, B., Quinn, B.T., Dickerson, B.C., Blacker, D., Buckner,  
14 R.L., Dale, A.M., Maguire, R.P., Hyman, B.T., Albert, M.S., Killiany, R.J., 2006. An  
15 automated labeling system for subdividing the human cerebral cortex on MRI scans into  
16 gyral based regions of interest. <https://doi.org/10.1016/j.neuroimage.2006.01.021>
- 17 Dixon, M.L., Christoff, K., 2012. The Decision to Engage Cognitive Control Is Driven by  
18 Expected Reward-Value: Neural and Behavioral Evidence. *PLoS One* 7, e51637.  
19 <https://doi.org/10.1371/journal.pone.0051637>
- 20 Duncan, J., 2010. The multiple-demand (MD) system of the primate brain: mental programs  
21 for intelligent behaviour. *Trends Cogn. Sci.* 14, 172–179.  
22 <https://doi.org/10.1016/J.TICS.2010.01.004>
- 23 Erez, Y., Duncan, J., 2015. Discrimination of Visual Categories Based on Behavioral  
24 Relevance in Widespread Regions of Frontoparietal Cortex. *J. Neurosci.* 35, 12383–93.

- 1        <https://doi.org/10.1523/JNEUROSCI.1134-15.2015>
- 2        Erez, Y., Yovel, G., 2014. Clutter Modulates the Representation of Target Objects in the  
3        Human Occipitotemporal Cortex. *J. Cogn. Neurosci.* 26, 490–500.  
4        [https://doi.org/10.1162/jocn\\_a\\_00505](https://doi.org/10.1162/jocn_a_00505)
- 5        Etzel, J.A., Cole, M.W., Zacks, J.M., Kay, K.N., Braver, T.S., 2016. Reward Motivation  
6        Enhances Task Coding in Frontoparietal Cortex. *Cereb. Cortex* 26, 1647–1659.  
7        <https://doi.org/10.1093/cercor/bhu327>
- 8        Faul, F., Erdfelder, E., Lang, A.-G., Axel, B., 2007. G\*Power 3: A flexible statistical power  
9        analysis program for the social, behavioral, and biomedical sciences. *Behav. Reseach*  
10       *Methods* 39, 175–191.
- 11       Fedorenko, E., Duncan, J., Kanwisher, N., 2013. Broad domain generality in focal regions of  
12       frontal and parietal cortex. *Proc. NatL Acad. Sci. USA* 110, 16616–21.  
13       <https://doi.org/10.1073/pnas.1315235110>
- 14       Fedorenko, E., Hsieh, P.-J., Nieto-Castañón, A., Whitfield-Gabrieli, S., Kanwisher, N., 2010.  
15       New method for fMRI investigations of language: defining ROIs functionally in  
16       individual subjects. *J. Neurophysiol.* 104, 1177–94.  
17       <https://doi.org/10.1152/jn.00032.2010>
- 18       Feinberg, D.A., Moeller, S., Smith, S.M., Auerbach, E., Ramanna, S., Gunther, M., Glasser,  
19       M.F., Miller, K.L., Ugurbil, K., Yacoub, E., 2010. Multiplexed echo planar imaging for  
20       sub-second whole brain FMRI and fast diffusion imaging. *PLoS One* 5, e15710.  
21       <https://doi.org/10.1371/journal.pone.0015710>
- 22       Freedman, D.J., Riesenhuber, M., Poggio, T., Miller, E.K., 2001. Categorical representation  
23       of visual stimuli in the primate prefrontal cortex. *Science* (80-. ). 291, 312–316.  
24       <https://doi.org/10.1126/science.291.5502.312>

- 1 Garvert, M.M., Moutoussis, M., Kurth-Nelson, Z., Behrens, T.E.J., Dolan, R.J., 2015.  
2 Learning-Induced plasticity in medial prefrontal cortex predicts preference malleability.  
3 *Neuron* 85, 418–428. <https://doi.org/10.1016/j.neuron.2014.12.033>
- 4 Hall-McMaster, S., Muhle-Karbe, P.S., Myers, N.E., Stokes, M.G., 2019. Reward Boosts  
5 Neural Coding of Task Rules to Optimize Cognitive Flexibility. *J. Neurosci.* 39, 8549–  
6 8561. <https://doi.org/10.1523/JNEUROSCI.0631-19.2019>
- 7 Harel, A., Kravitz, D.J., Baker, C.I., 2014. Task context impacts visual object processing  
8 differentially across the cortex. *Proc. Natl Acad. Sci. USA* 111, E962–E971.  
9 <https://doi.org/10.1073/pnas.1312567111>
- 10 Hebart, M.N., Bankson, B.B., Harel, A., Baker, C.I., Cichy, R.M., 2018. The representational  
11 dynamics of task and object processing in humans. *Elife* 7.  
12 <https://doi.org/10.7554/eLife.32816>
- 13 Hebart, M.N., Gorgen, K., Haynes, J.-D., 2015. The Decoding Toolbox (TDT): a versatile  
14 software package for multivariate analyses of functional imaging data. *Front.*  
15 *Neuroinform.* 8, 88. <https://doi.org/10.3389/fninf.2014.00088>
- 16 Jackson, J., Rich, A.N., Williams, M.A., Woolgar, A., 2017. Feature-selective Attention in  
17 Frontoparietal Cortex: Multivoxel Codes Adjust to Prioritize Task-relevant Information.  
18 *J. Cogn. Neurosci.* 29, 310–321. [https://doi.org/10.1162/jocn\\_a\\_01039](https://doi.org/10.1162/jocn_a_01039)
- 19 Jiang, X., Bradley, E., Rini, R.A., Zeffiro, T., Vanmeter, J., Riesenhuber, M., 2007.  
20 Categorization Training Results in Shape-and Category-Selective Human Neural  
21 Plasticity. *Neuron* 53, 891–903. <https://doi.org/10.1016/j.neuron.2007.02.015>
- 22 Kadohisa, M., Kusunoki, M., Petrov, P., Sigala, N., Buckley, M.J., Gaffan, D., Duncan, J.,  
23 2015. Spatial and temporal distribution of visual information coding in lateral prefrontal  
24 cortex. *Eur. J. Neurosci.* 41, 89–96. <https://doi.org/10.1111/ejn.12754>



- 1 Kennerley, S.W., Wallis, J.D., 2009. Reward-dependent modulation of working memory in  
2 lateral prefrontal cortex. *J. Neurosci.* 29, 3259–70.  
3 <https://doi.org/10.1523/JNEUROSCI.5353-08.2009>
- 4 Krebs, R.M., Boehler, C.N., Appelbaum, L.G., Woldorff, M., 2013. Reward Associations  
5 Reduce Behavioral Interference by Changing the Temporal Dynamics of Conflict  
6 Processing. *PLoS One* 8, e53894. <https://doi.org/10.1371/journal.pone.0053894>
- 7 Krebs, R.M., Boehler, C.N., Roberts, K.C., Song, A.W., Woldorff, M., 2012. The  
8 involvement of the dopaminergic midbrain and cortico-striatal-thalamic circuits in the  
9 integration of reward prospect and attentional task demands. *Cereb. Cortex* 22, 607–15.  
10 <https://doi.org/10.1093/cercor/bhr134>
- 11 Kriegeskorte, N., Goebel, R., Bandettini, P., 2006. Information-based functional brain  
12 mapping. *Proc. Natl Acad. Sci. USA* 103, 3863–3868.
- 13 Kruglanski, A.W., Shah, J.Y., Fishbach, A., Friedman, R., Woo Young Chun, Sleeth-  
14 Keppler, D., 2002. A theory of goal systems. *Adv. Exp. Soc. Psychol.* 34, 331–378.  
15 [https://doi.org/10.1016/S0065-2601\(02\)80008-9](https://doi.org/10.1016/S0065-2601(02)80008-9)
- 16 Leon, M.I., Shadlen, M.N., 1999. Effect of Expected Reward Magnitude on the Response of  
17 Neurons in the Dorsolateral Prefrontal Cortex of the Macaque. *Neuron* 24, 415–425.  
18 [https://doi.org/10.1016/S0896-6273\(00\)80854-5](https://doi.org/10.1016/S0896-6273(00)80854-5)
- 19 Li, S., Ostwald, D., Giese, M., Kourtzi, Z., 2007. Flexible Coding for Categorical Decisions  
20 in the Human Brain. *J. Neurosci.* 27, 12321–12330.  
21 <https://doi.org/10.1523/JNEUROSCI.3795-07.2007>
- 22 MacEvoy, S.P., Epstein, R.A., 2011. Constructing scenes from objects in human  
23 occipitotemporal cortex. *Nat. Neurosci.* 14, 1323–1329. <https://doi.org/10.1038/nn.2903>
- 24 Malach, R., Reppas, J.B., Benson, R.R., Kwong, K.K., Jiang, H., Kennedy, W.A., Ledden,

- 1 P.J., Brady, T.J., Rosen, B.R., Tootell, R.B., 1995. Object-related activity revealed by  
2 functional magnetic resonance imaging in human occipital cortex. *Proc. NatL Acad. Sci.*  
3 *USA* 92, 8135–9. <https://doi.org/10.1073/PNAS.92.18.8135>
- 4 Miller, G.A., Galanter, E., Pribram, K.. H., 1960. *Plans and the structure of behavior*. Holt,  
5 Rinehart and Winston, Inc.
- 6 Mohanty, A., Gitelman, D.R., Small, D.M., Mesulam, M.M., 2008. The Spatial Attention  
7 Network Interacts with Limbic and Monoaminergic Systems to Modulate Motivation-  
8 Induced Attention Shifts. *Cereb. Cortex* 18, 2604–2613.  
9 <https://doi.org/10.1093/cercor/bhn021>
- 10 Muhle-Karbe, P.S., Duncan, J., De Baene, W., Mitchell, D.J., Brass, M., 2017. Neural  
11 Coding for Instruction-Based Task Sets in Human Frontoparietal and Visual Cortex.  
12 *Cereb. Cortex* 27, 1891–1905. <https://doi.org/10.1093/cercor/bhw032>
- 13 Myers, N.E., Rohenkohl, G., Wyart, V., Woolrich, M.W., Nobre, A.C., Stokes, M.G., 2015.  
14 Testing sensory evidence against mnemonic templates. *Elife* 4.  
15 <https://doi.org/10.7554/eLife.09000>
- 16 Nastase, S.A., Connolly, A.C., Oosterhof, N.N., Halchenko, Y.O., Guntupalli, J.S., Visconti,  
17 M., Castello, O., Gors, J., Gobbini, M.I., Haxby, J. V, 2017. Attention Selectively  
18 Reshapes the Geometry of Distributed Semantic Representation. *Cereb. Cortex* 27,  
19 4277–4291. <https://doi.org/10.1093/cercor/bhx138>
- 20 Nili, H., Wingfield, C., Walther, A., Su, L., Marslen-Wilson, W., Kriegeskorte, N., 2014. A  
21 Toolbox for Representational Similarity Analysis. *PLoS Comput. Biol.* 10, e1003553.  
22 <https://doi.org/10.1371/journal.pcbi.1003553>
- 23 Ott, T., Nieder, A., 2016. Dopamine D2 Receptors Enhance Population Dynamics in Primate  
24 Prefrontal Working Memory Circuits. *Cereb. Cortex* 27, 4423–4435.

- 1        <https://doi.org/10.1093/cercor/bhw244>
- 2        Padmala, S., Pessoa, L., 2011. Reward Reduces Conflict by Enhancing Attentional Control  
3        and Biasing Visual Cortical Processing. *J. Cogn. Neurosci.* 23, 3419–3432.  
4        [https://doi.org/10.1162/jocn\\_a\\_00011](https://doi.org/10.1162/jocn_a_00011)
- 5        Padmala, S., Pessoa, L., 2010. Interactions between cognition and motivation during response  
6        inhibition. *Neuropsychologia* 48, 558–565.  
7        <https://doi.org/10.1016/j.neuropsychologia.2009.10.017>
- 8        Pessoa, L., 2009. How do emotion and motivation direct executive control? *Trends Cogn.*  
9        *Sci.* 13, 160–6. <https://doi.org/10.1016/j.tics.2009.01.006>
- 10       Pochon, J.B., Levy, R., Fossati, P., Lehericy, S., Poline, J.B., Pillon, B., Le Bihan, D.,  
11       Dubois, B., 2002. The neural system that bridges reward and cognition in humans: An  
12       fMRI study. *Proc. NatL Acad. Sci. USA* 99, 5669–5674.  
13       <https://doi.org/10.1073/pnas.082111099>
- 14       Schneider, W., Fisk, A.D., 1983. Attention theory and mechanisms for skilled performance.  
15       *Adv. Psychol.* 12, 119–143. [https://doi.org/10.1016/S0166-4115\(08\)61989-5](https://doi.org/10.1016/S0166-4115(08)61989-5)
- 16       Schultz, W., Dayan, P., Montague, P.R., 1997. A neural substrate of prediction and reward.  
17       *Science* (80-. ). 275, 1593–1599. <https://doi.org/10.1126/science.275.5306.1593>
- 18       Shashidhara, S., Mitchell, D.J., Erez, Y., Duncan, J., 2019. Progressive Recruitment of the  
19       Frontoparietal Multiple-demand System with Increased Task Complexity, Time  
20       Pressure, and Reward. *J. Cogn. Neurosci.* 31, 1617–1630.  
21       [https://doi.org/10.1162/jocn\\_a\\_01440](https://doi.org/10.1162/jocn_a_01440)
- 22       Shashidhara, S., Spronkers, F.S., Erez, Y., 2020. Individual-subject functional localization  
23       increases univariate activation but not multivariate pattern discriminability in the  
24       “multiple-demand” frontoparietal network. *J. Cogn. Neurosci.* 32, 1348–1368.

- 1        [https://doi.org/10.1162/jocn\\_a\\_01554](https://doi.org/10.1162/jocn_a_01554)
- 2        Shenhav, A., Botvinick, M., Cohen, J.D., 2013. The Expected Value of Control: An  
3        Integrative Theory of Anterior Cingulate Cortex Function. *Neuron* 79, 217–240.  
4        <https://doi.org/10.1016/J.NEURON.2013.07.007>
- 5        Shiffrin, R.M., Schneider, W., 1977. Controlled and automatic human information  
6        processing: II. Perceptual learning, automatic attending and a general theory. *Psychol.*  
7        *Rev.* 84, 127–190. <https://doi.org/10.1037/0033-295X.84.2.127>
- 8        Simon, H.A., 1967. Motivational and emotional Controls of Cognition. *Psychol. Rev.* 74, 29–  
9        39.
- 10       Sprague, T.C., Ester, E.F., Serences, J.T., 2016. Restoring Latent Visual Working Memory  
11       Representations in Human Cortex. *Neuron* 91, 694–707.  
12       <https://doi.org/10.1016/j.neuron.2016.07.006>
- 13       Stürmer, B., Nigbur, R., Schacht, A., Sommer, W., 2011. Reward and punishment effects on  
14       error processing and conflict control. *Front. Psychol.* 2, 335.  
15       <https://doi.org/10.3389/fpsyg.2011.00335>
- 16       Tankelevitch, L., Spaak, E., Rushworth, M.F.S., Stokes, M.G., 2020. Previously Reward-  
17       Associated Stimuli Capture Spatial Attention in the Absence of Changes in the  
18       Corresponding Sensory Representations as Measured with MEG. *J. Neurosci.* 40, 5033–  
19       5050. <https://doi.org/10.1523/jneurosci.1172-19.2020>
- 20       Taylor, S.F., Welsh, R.C., Wager, T.D., Luan Phan, K., Fitzgerald, K.D., Gehring, W.J.,  
21       2004. A functional neuroimaging study of motivation and executive function.  
22       *Neuroimage* 21, 1045–1054. <https://doi.org/10.1016/J.NEUROIMAGE.2003.10.032>
- 23       Thurley, K., Senn, W., Lüscher, H.-R., 2008. Dopamine Increases the Gain of the Input-  
24       Output Response of Rat Prefrontal Pyramidal Neurons. *J. Neurophysiol.* 99, 2985–2997.

- 1        <https://doi.org/10.1152/jn.01098.2007>
- 2        van der Kouwe, A.J.W., Benner, T., Salat, D.H., Fischl, B., 2008. Brain morphometry with  
3        multiecho MPRAGE. *Neuroimage* 40, 559–569.  
4        <https://doi.org/10.1016/j.neuroimage.2007.12.025>
- 5        Vergauwe, E., Hartstra, E., Barrouillet, P., Brass, M., 2015. Domain-general involvement of  
6        the posterior frontolateral cortex in time-based resource-sharing in working memory: An  
7        fMRI study. *Neuroimage* 115, 104. <https://doi.org/10.1016/j.neuroimage.2015.04.059>
- 8        Vijayraghavan, S., Wang, M., Birnbaum, S.G., Williams, G. V, Arnsten, A.F.T., 2007.  
9        Inverted-U dopamine D1 receptor actions on prefrontal neurons engaged in working  
10       memory. *Nat. Neurosci.* 10, 376–384. <https://doi.org/10.1038/nn1846>
- 11       Watanabe, M., 1996. Reward expectancy in primate prefrontal neurons. *Nature* 382, 629–632.  
12       <https://doi.org/10.1038/382629a0>
- 13       Wisniewski, D., Goschke, T., Haynes, J.-D., 2016. Similar coding of freely chosen and  
14       externally cued intentions in a fronto-parietal network. *Neuroimage* 134, 450–458.  
15       <https://doi.org/10.1016/J.NEUROIMAGE.2016.04.044>
- 16       Woolgar, A., Golland, P., Bode, S., 2014. Coping with confounds in multivoxel pattern  
17       analysis: What should we do about reaction time differences? A comment on Todd,  
18       Nystrom & Cohen 2013. *Neuroimage* 98, 506–512.  
19       <https://doi.org/10.1016/J.NEUROIMAGE.2014.04.059>
- 20       Woolgar, A., Williams, M.A., Rich, A.N., 2015. Attention enhances multi-voxel  
21       representation of novel objects in frontal, parietal and visual cortices. *Neuroimage* 109,  
22       429–437. <https://doi.org/10.1016/j.neuroimage.2014.12.083>
- 23

1 Tables

2

3 **Table 1: Decoding accuracies for pairs of behavioral status across the MD network.**

4 *t* values are for a one-tailed t-test against chance level (50%). Corrected *p* values were obtained

5 using Bonferroni correction for 6 comparisons. + *p* < 0.06, \* *p* < 0.05, \*\* *p* < 0.01

| <b>Distinction</b>                        | <b>Reward level</b> | <b>Mean ± S.E.M (%)</b> | <b><i>t</i><sub>23</sub> value</b> | <b>Uncorrected <i>p</i></b> | <b>corrected <i>p</i></b> | <b>Effect size</b> |
|-------------------------------------------|---------------------|-------------------------|------------------------------------|-----------------------------|---------------------------|--------------------|
| Target vs.                                | No-reward           | 50.9 ± 0.6              | 1.43                               | 0.083                       | 0.5                       | 0.29               |
| High-conflict nontarget                   | Reward              | 52 ± 0.8                | 2.56                               | ** 0.009                    | + 0.053                   | 0.52               |
| Target vs.                                | No-reward           | 52.4 ± 0.7              | 3.24                               | ** 0.002                    | * 0.011                   | 0.66               |
| Low-conflict nontarget                    | Reward              | 52.1 ± 0.9              | 2.23                               | * 0.02                      | 0.11                      | 0.45               |
| High-conflict vs. Low-conflict nontargets | No-reward           | 50.9 ± 0.9              | 1.32                               | 0.2                         | 1                         | 0.20               |
|                                           | Reward              | 51.4 ± 1.1              | 0.96                               | 0.1                         | 0.6                       | 0.27               |

6
